# Supplementary material for: Association of job stress, FK506 binding protein 51 (FKBP5) gene polymorphisms and their interaction with sleep disturbance
Source: PeerJ. 2023 Jan 30;11:e14794. doi: 10.7717/peerj.14794 (PMC9893914; doi:10.7717/peerj.14794)
Supplement: Data S1 [file peerj-11-14794-s001.xlsx]

## Sheet: Sheet1
Gender	Age	Ethnicity	Marital status	Smoking status	Alcohol consumption	job effort	job reward	overcommitment	ERI ratio	ERI group	Subjective Sleep Quality	Sleep Latency	Sleep Duration	Sleep Efficiency	Sleep Disturbance	Sleep Medication	Daytime Dysfunction	PSQI total scores	PSQI group	rs1360780	rs3800373	rs9470080	rs1360780a	rs3800373a	rs9470080a	rs1360780b	rs3800373b
1	3	1	2	2	2	24	47	22	0.94	1	0	0	0	0	0	0	0	0	0	C/C	A/A	C/C	1	1	1	1	1
1	1	1	1	2	1	12	23	6	0.96	1	0	0	0	0	0	0	0	0	0	C/C	A/A	C/T	1	1	2	1	1
1	4	1	2	1	2	21	42	20	0.92	1	0	0	0	0	0	0	0	0	0	C/C	A/A	C/C	1	1	1	1	1
1	1	1	2	2	1	16	33	17	0.89	1	0	0	0	0	0	0	0	0	0	C/C	A/A	C/T	1	1	2	1	1
1	1	1	2	1	1	6	19	6	0.58	1	0	0	0	0	0	0	0	0	0	C/C	A/A	C/C	1	1	1	1	1
2	3	2	2	2	2	18	33	21	1	1	0	0	0	0	0	0	0	0	0	C/T	C/A	C/T	2	2	2	2	2
1	3	1	2	1	1	16	35	19	0.84	1	0	0	0	0	0	0	0	0	0	C/T	C/A	C/C	2	2	1	2	2
2	2	1	2	1	1	16	31	17	0.95	1	0	0	0	0	0	0	0	0	0	C/T	C/A	C/T	2	2	2	2	2
2	2	1	2	2	2	20	38	19	0.96	1	0	0	0	0	0	0	0	0	0	C/T	C/A	C/T	2	2	2	2	2
1	4	1	2	2	2	9	17	8	0.97	1	0	0	0	0	0	0	0	0	0	C/T	C/A	C/T	2	2	2	2	2
1	3	1	1	1	1	18	33	17	1	1	0	0	0	0	0	0	0	0	0	C/T	C/A	C/T	2	2	2	2	2
2	1	2	2	2	2	13	34	17	0.7	1	0	1	0	0	0	0	0	1	0	C/C	A/A	C/T	1	1	2	1	1
2	2	2	1	2	2	17	38	13	0.82	1	0	1	0	0	0	0	0	1	0	C/C	A/A	C/C	1	1	1	1	1
2	2	2	2	2	2	16	33	18	0.89	1	0	1	0	0	0	0	0	1	0	C/C	A/A	C/C	1	1	1	1	1
1	2	2	2	1	2	18	33	18	1	1	0	1	0	0	0	0	0	1	0	C/C	A/A	C/C	1	1	1	1	1
1	2	1	2	1	1	18	36	19	0.92	1	0	0	0	0	0	0	1	1	0	C/C	A/A	C/C	1	1	1	1	1
2	3	1	2	2	2	6	26	12	0.42	1	0	1	0	0	0	0	0	1	0	C/C	A/A	C/T	1	1	2	1	1
1	4	2	2	2	1	14	37	16	0.69	1	0	0	0	0	1	0	0	1	0	C/C	A/A	C/C	1	1	1	1	1
1	4	1	2	1	1	12	32	11	0.69	1	0	1	0	0	0	0	0	1	0	C/C	C/A	C/C	1	2	1	1	2
1	1	2	2	2	2	6	11	6	1	1	0	1	0	0	0	0	0	1	0	C/C	A/A	C/C	1	1	1	1	1
1	2	2	2	1	1	15	41	18	0.67	1	0	0	0	1	0	0	0	1	0	C/C	A/A	C/T	1	1	2	1	1
1	2	1	2	2	1	30	55	30	1	1	0	0	0	0	1	0	0	1	0	C/C	A/A	C/T	1	1	2	1	1
2	2	1	2	2	2	18	37	18	0.89	1	0	0	0	0	0	1	0	1	0	C/C	A/A	C/T	1	1	2	1	1
2	1	1	1	2	2	16	33	17	0.89	1	0	0	0	0	0	0	1	1	0	C/C	A/A	C/C	1	1	1	1	1
2	4	1	2	2	2	18	37	22	0.89	1	0	0	1	0	0	0	0	1	0	C/C	A/A	C/C	1	1	1	1	1
1	3	1	2	2	1	14	28	15	0.92	1	0	1	0	0	0	0	0	1	0	C/C	A/A	C/C	1	1	1	1	1
2	2	1	2	1	1	19	38	23	0.92	1	0	1	0	0	0	0	0	1	0	C/C	A/A	C/C	1	1	1	1	1
1	3	1	2	1	1	18	36	18	0.92	1	0	1	0	0	0	0	0	1	0	C/C	A/A	C/C	1	1	1	1	1
2	3	1	2	2	2	18	39	18	0.85	1	0	0	0	1	0	0	0	1	0	C/C	A/A	C/C	1	1	1	1	1
1	2	1	3	2	2	19	35	15	1	1	0	1	0	0	0	0	0	1	0	C/C	A/A	C/T	1	1	2	1	1
2	1	1	1	1	2	17	39	18	0.8	1	0	1	0	0	0	0	0	1	0	C/C	A/A	C/C	1	1	1	1	1
1	2	1	2	2	2	12	22	12	1	1	0	1	0	0	0	0	0	1	0	C/C	A/A	C/C	1	1	1	1	1
2	3	2	2	2	2	15	37	15	0.74	1	0	0	0	0	0	0	1	1	0	C/C	A/A	C/C	1	1	1	1	1
1	1	1	1	1	1	13	32	17	0.74	1	0	1	0	0	0	0	0	1	0	C/C	A/A	C/T	1	1	2	1	1
2	1	1	1	2	2	14	36	20	0.71	1	0	1	0	0	0	0	0	1	0	C/C	A/A	C/C	1	1	1	1	1
1	3	1	2	1	2	13	30	19	0.79	1	0	0	0	0	0	0	1	1	0	C/C	A/A	C/C	1	1	1	1	1
2	2	2	2	2	2	18	33	18	1	1	0	1	0	0	0	0	0	1	0	C/C	A/A	C/C	1	1	1	1	1
1	1	1	1	2	2	12	38	22	0.58	1	0	1	0	0	0	0	0	1	0	C/C	A/A	C/C	1	1	1	1	1
1	2	2	2	1	1	18	33	18	1	1	0	0	0	0	0	0	1	1	0	C/C	A/A	C/T	1	1	2	1	1
1	1	1	1	1	1	22	45	18	0.9	1	0	1	0	0	0	0	0	1	0	C/C	A/A	C/T	1	1	2	1	1
2	2	1	2	2	1	16	35	24	0.84	1	0	0	0	1	0	0	0	1	0	C/C	A/A	C/C	1	1	1	1	1
2	3	2	2	2	2	7	15	10	0.86	1	0	0	0	0	0	0	1	1	0	C/C	A/A	C/C	1	1	1	1	1
1	2	2	3	1	1	12	31	17	0.71	1	0	1	0	0	0	0	0	1	0	C/T	C/A	C/T	2	2	2	2	2
1	3	1	2	1	2	6	11	6	1	1	0	1	0	0	0	0	0	1	0	C/T	C/A	C/T	2	2	2	2	2
2	4	1	2	2	2	18	33	18	1	1	0	0	1	0	0	0	0	1	0	C/T	A/A	C/T	2	1	2	2	1
2	3	1	2	2	1	13	34	19	0.7	1	0	0	1	0	0	0	0	1	0	C/T	C/A	C/T	2	2	2	2	2
2	2	1	2	2	2	21	39	20	0.99	1	0	0	0	0	0	0	1	1	0	C/T	A/A	C/T	2	1	2	2	1
2	3	1	3	1	1	6	11	6	1	1	0	1	0	0	0	0	0	1	0	C/T	C/A	C/T	2	2	2	2	2
1	2	1	1	1	1	16	31	20	0.95	1	0	0	0	0	0	0	1	1	0	C/T	C/A	C/T	2	2	2	2	2
1	4	2	2	1	1	12	22	12	1	1	0	1	0	0	0	0	0	1	0	C/T	C/A	C/T	2	2	2	2	2
1	2	1	2	1	1	30	55	30	1	1	0	1	0	0	0	0	0	1	0	C/T	C/A	C/T	2	2	2	2	2
1	1	1	1	2	2	18	33	18	1	1	0	1	0	0	0	0	0	1	0	C/T	C/A	C/T	2	2	2	2	2
1	3	1	3	2	1	16	35	9	0.84	1	0	1	0	0	0	0	0	1	0	C/T	C/A	C/T	2	2	2	2	2
2	3	2	2	1	2	30	55	22	1	1	0	1	0	0	0	0	0	1	0	C/T	C/A	C/T	2	2	2	2	2
1	1	2	2	1	1	6	11	6	1	1	0	1	0	0	0	0	0	1	0	C/T	C/A	C/T	2	2	2	2	2
1	2	1	2	2	2	18	33	18	1	1	0	1	0	0	0	0	0	1	0	C/T	C/A	C/T	2	2	2	2	2
1	4	1	2	2	1	6	11	6	1	1	0	1	0	0	0	0	0	1	0	C/T	C/A	C/T	2	2	2	2	2
2	2	2	2	2	2	17	39	6	0.8	1	0	1	0	0	0	0	0	1	0	C/T	C/A	C/T	2	2	2	2	2
2	2	2	2	2	2	16	30	17	0.98	1	0	0	0	0	1	0	0	1	0	C/T	C/A	C/T	2	2	2	2	2
2	1	1	2	2	1	8	37	17	0.4	1	0	0	0	1	0	0	0	1	0	C/T	C/A	C/T	2	2	2	2	2
2	2	1	2	2	2	16	32	20	0.92	1	0	1	0	0	0	0	0	1	0	C/C	A/A	T/T	1	1	3	1	1
2	3	1	2	2	1	12	32	6	0.69	1	0	0	0	0	0	0	1	1	0	C/C	A/A	T/T	1	1	3	1	1
2	2	1	2	2	2	17	39	14	0.8	1	0	1	0	0	0	0	0	1	0	C/C	C/A	T/T	1	2	3	1	2
1	1	1	1	1	1	16	34	16	0.86	1	0	1	0	0	0	0	0	1	0	C/T	C/A	T/T	2	2	3	2	2
1	2	1	2	2	2	17	34	19	0.92	1	0	1	0	0	0	0	0	1	0	C/T	C/A	T/T	2	2	3	2	2
1	4	1	2	1	1	24	45	24	0.98	1	0	1	0	0	0	0	0	1	0	C/C	C/C	T/T	1	3	3	1	2
1	2	1	3	1	1	18	35	20	0.94	1	1	0	0	0	1	0	0	2	0	C/C	A/A	C/C	1	1	1	1	1
2	3	1	2	2	1	9	27	21	0.61	1	0	1	0	1	0	0	0	2	0	C/C	A/A	C/C	1	1	1	1	1
1	2	2	2	1	2	15	30	23	0.92	1	0	1	1	0	0	0	0	2	0	C/C	A/A	C/T	1	1	2	1	1
1	4	2	2	1	1	14	35	22	0.73	1	0	1	0	0	0	0	1	2	0	C/C	A/A	C/C	1	1	1	1	1
1	3	1	2	2	1	17	37	22	0.84	1	0	1	0	0	0	0	1	2	0	C/C	A/A	C/C	1	1	1	1	1
2	2	1	2	2	1	13	44	15	0.54	1	0	0	0	0	1	0	1	2	0	C/C	A/A	C/T	1	1	2	1	1
1	2	1	3	1	1	6	27	18	0.41	1	0	1	0	1	0	0	0	2	0	C/C	A/A	C/T	1	1	2	1	1
1	4	1	2	1	1	15	35	24	0.79	1	0	1	0	1	0	0	0	2	0	C/C	A/A	C/C	1	1	1	1	1
1	2	1	2	1	1	13	28	15	0.85	1	0	0	0	1	0	0	1	2	0	C/C	A/A	C/T	1	1	2	1	1
1	2	1	1	2	1	20	40	19	0.92	1	0	0	0	0	0	1	1	2	0	C/C	A/A	C/C	1	1	1	1	1
1	2	1	2	1	2	13	27	15	0.88	1	0	1	0	0	0	1	0	2	0	C/C	A/A	C/C	1	1	1	1	1
1	4	1	2	1	1	17	32	17	0.97	1	0	1	0	1	0	0	0	2	0	C/C	A/A	C/T	1	1	2	1	1
2	1	1	2	2	2	14	39	18	0.66	1	0	1	0	1	0	0	0	2	0	C/C	A/A	C/C	1	1	1	1	1
1	4	1	2	1	1	18	33	18	1	1	0	1	0	0	1	0	0	2	0	C/C	A/A	C/C	1	1	1	1	1
1	2	2	2	1	1	17	33	18	0.94	1	0	1	0	0	1	0	0	2	0	C/C	A/A	C/C	1	1	1	1	1
2	3	1	2	2	2	6	23	6	0.48	1	0	1	1	0	0	0	0	2	0	C/C	A/A	C/T	1	1	2	1	1
1	2	1	2	2	1	18	35	17	0.94	1	0	1	0	0	1	0	0	2	0	C/C	A/A	C/C	1	1	1	1	1
2	3	1	2	2	2	18	35	18	0.94	1	0	1	1	0	0	0	0	2	0	C/C	A/A	C/C	1	1	1	1	1
1	1	1	1	1	1	18	33	17	1	1	0	1	0	0	1	0	0	2	0	C/C	A/A	C/C	1	1	1	1	1
1	3	1	2	1	2	9	43	11	0.38	1	0	0	0	1	0	0	1	2	0	C/C	A/A	C/C	1	1	1	1	1
1	2	2	2	2	2	11	24	9	0.84	1	0	1	0	0	0	1	0	2	0	C/C	A/A	C/C	1	1	1	1	1
1	2	2	2	2	2	17	32	11	0.97	1	0	1	0	0	0	0	1	2	0	C/C	A/A	C/C	1	1	1	1	1
2	2	1	2	2	1	18	39	17	0.85	1	0	0	0	0	1	0	1	2	0	C/C	A/A	C/C	1	1	1	1	1
1	2	1	1	1	1	16	35	16	0.84	1	0	1	0	0	1	0	0	2	0	C/C	C/A	C/C	1	2	1	1	2
1	2	1	1	1	1	13	29	11	0.82	1	0	1	0	1	0	0	0	2	0	C/C	A/A	C/C	1	1	1	1	1
1	3	1	2	1	1	14	30	16	0.86	1	0	0	0	2	0	0	0	2	0	C/C	A/A	C/T	1	1	2	1	1
1	2	2	2	1	2	6	20	6	0.55	1	0	1	0	0	0	0	1	2	0	C/C	A/A	C/C	1	1	1	1	1
2	2	1	2	2	2	15	36	17	0.76	1	0	1	0	0	1	0	0	2	0	C/C	A/A	C/C	1	1	1	1	1
1	2	1	2	1	1	18	37	20	0.89	1	0	0	0	2	0	0	0	2	0	C/C	A/A	C/C	1	1	1	1	1
1	2	1	2	1	1	20	40	23	0.92	1	0	0	0	0	1	0	1	2	0	C/C	A/A	C/C	1	1	1	1	1
1	3	1	2	1	1	14	33	18	0.78	1	0	1	0	1	0	0	0	2	0	C/T	C/A	C/T	2	2	2	2	2
1	3	1	2	1	2	17	36	18	0.87	1	0	1	0	0	1	0	0	2	0	C/T	C/A	C/T	2	2	2	2	2
2	2	1	2	2	2	14	33	18	0.78	1	0	1	0	0	1	0	0	2	0	C/T	C/A	C/T	2	2	2	2	2
1	3	1	2	1	1	12	36	19	0.61	1	0	1	0	0	1	0	0	2	0	C/T	C/A	C/T	2	2	2	2	2
2	3	1	2	2	1	17	34	18	0.92	1	0	1	0	1	0	0	0	2	0	C/T	C/A	C/T	2	2	2	2	2
2	2	1	2	2	1	18	35	22	0.94	1	0	1	0	0	1	0	0	2	0	C/T	C/A	C/T	2	2	2	2	2
2	1	1	2	2	2	21	41	19	0.94	1	0	0	0	0	1	0	1	2	0	C/T	C/A	C/T	2	2	2	2	2
1	3	1	2	1	1	17	38	21	0.82	1	0	1	0	0	1	0	0	2	0	C/T	C/A	C/T	2	2	2	2	2
2	3	1	2	2	1	18	41	19	0.8	1	0	1	0	0	1	0	0	2	0	C/T	C/A	C/T	2	2	2	2	2
2	2	1	2	2	1	14	41	18	0.63	1	0	0	0	0	1	1	0	2	0	C/T	C/A	C/T	2	2	2	2	2
1	4	1	2	1	1	14	32	14	0.8	1	0	1	1	0	0	0	0	2	0	C/T	C/A	C/T	2	2	2	2	2
2	4	2	2	2	2	6	21	11	0.52	1	0	1	0	1	0	0	0	2	0	C/T	C/A	C/T	2	2	2	2	2
1	3	1	2	1	1	18	33	18	1	1	0	1	0	1	0	0	0	2	0	C/T	C/A	C/T	2	2	2	2	2
2	1	1	2	2	1	9	29	10	0.57	1	0	1	1	0	0	0	0	2	0	C/T	C/A	C/T	2	2	2	2	2
1	2	2	2	1	1	16	35	17	0.84	1	0	0	1	1	0	0	0	2	0	C/T	C/A	C/T	2	2	2	2	2
2	1	1	2	2	1	6	35	10	0.31	1	0	1	0	0	1	0	0	2	0	C/T	C/A	C/T	2	2	2	2	2
1	2	1	2	2	1	18	33	16	1	1	0	0	0	0	0	2	0	2	0	C/T	C/A	C/T	2	2	2	2	2
1	2	1	2	1	1	15	31	17	0.89	1	0	1	0	0	0	0	1	2	0	C/T	C/A	C/T	2	2	2	2	2
2	2	1	2	2	2	12	30	21	0.73	1	0	1	0	0	0	0	1	2	0	C/T	C/A	C/T	2	2	2	2	2
1	1	1	2	1	2	15	35	14	0.79	1	0	0	0	0	1	0	1	2	0	C/T	C/A	C/T	2	2	2	2	2
2	1	1	1	2	1	15	35	15	0.79	1	0	1	0	1	0	0	0	2	0	C/C	A/A	T/T	1	1	3	1	1
2	1	1	2	2	2	18	33	17	1	1	0	1	0	0	1	0	0	2	0	C/T	C/A	T/T	2	2	3	2	2
1	4	1	2	1	2	15	29	11	0.95	1	0	0	0	1	0	0	1	2	0	C/C	A/A	T/T	1	1	3	1	1
1	2	1	2	2	1	16	38	18	0.77	1	0	1	0	0	1	0	0	2	0	T/T	A/A	T/T	3	1	3	2	1
2	2	2	2	2	2	18	33	20	1	1	0	0	0	0	1	0	1	2	0	T/T	A/A	T/T	3	1	3	2	1
1	2	2	2	1	1	6	11	10	1	1	0	1	0	0	1	0	0	2	0	T/T	A/A	T/T	3	1	3	2	1
2	1	1	1	2	2	8	39	14	0.38	1	0	0	0	0	1	0	2	3	0	C/C	A/A	C/C	1	1	1	1	1
2	1	1	2	2	1	13	38	17	0.63	1	2	0	0	0	0	0	1	3	0	C/T	C/A	C/T	2	2	2	2	2
1	2	1	1	1	1	17	55	30	0.57	1	2	0	0	1	0	0	0	3	0	C/T	C/A	C/T	2	2	2	2	2
2	1	1	1	2	1	17	34	19	0.92	1	1	0	0	0	0	1	1	3	0	C/C	A/A	C/C	1	1	1	1	1
1	2	2	2	1	1	30	55	30	1	1	1	1	0	0	0	0	1	3	0	C/T	C/A	C/T	2	2	2	2	2
2	2	1	2	2	1	19	35	16	1	1	0	0	0	0	1	1	1	3	0	C/C	A/A	C/C	1	1	1	1	1
1	1	1	1	1	1	12	23	20	0.96	1	0	2	0	0	1	0	0	3	0	C/C	A/A	C/C	1	1	1	1	1
2	2	1	2	2	2	17	40	18	0.78	1	0	1	0	0	1	0	1	3	0	C/C	A/A	C/C	1	1	1	1	1
2	3	1	2	2	2	13	35	6	0.68	1	0	1	1	0	1	0	0	3	0	C/C	A/A	C/C	1	1	1	1	1
2	2	1	2	2	2	14	33	16	0.78	1	1	0	0	0	1	1	0	3	0	C/C	A/A	C/C	1	1	1	1	1
1	2	1	2	2	1	10	33	18	0.56	1	0	1	1	0	0	0	1	3	0	C/C	A/A	C/C	1	1	1	1	1
2	1	1	1	2	2	17	33	18	0.94	1	0	1	0	2	0	0	0	3	0	C/C	A/A	C/C	1	1	1	1	1
2	1	1	2	2	2	14	38	12	0.68	1	0	1	0	1	1	0	0	3	0	C/C	A/A	C/C	1	1	1	1	1
2	4	1	2	2	1	9	19	9	0.87	1	0	0	0	0	1	1	1	3	0	C/C	A/A	C/T	1	1	2	1	1
2	2	1	2	2	2	16	42	18	0.7	1	0	0	0	0	1	1	1	3	0	C/C	A/A	C/C	1	1	1	1	1
2	3	1	2	2	2	15	37	14	0.74	1	0	1	1	0	0	0	1	3	0	C/C	A/A	C/C	1	1	1	1	1
2	1	1	2	2	2	16	35	23	0.84	1	0	0	0	2	1	0	0	3	0	C/C	A/A	C/C	1	1	1	1	1
2	1	1	2	2	1	20	37	18	0.99	1	0	0	1	0	1	0	1	3	0	C/C	A/A	C/T	1	1	2	1	1
2	2	1	2	2	1	17	36	18	0.87	1	0	0	0	1	1	0	1	3	0	C/C	A/A	C/T	1	1	2	1	1
2	1	1	1	2	2	15	29	15	0.95	1	0	0	0	0	0	2	1	3	0	C/C	A/A	C/C	1	1	1	1	1
2	4	1	2	2	2	15	28	17	0.98	1	0	1	1	0	1	0	0	3	0	C/C	A/A	C/C	1	1	1	1	1
2	1	2	1	2	2	18	33	16	1	1	0	1	0	0	0	1	1	3	0	C/C	A/A	C/C	1	1	1	1	1
2	2	2	1	2	1	14	37	21	0.69	1	0	0	0	0	1	1	1	3	0	C/C	A/A	C/C	1	1	1	1	1
1	2	1	1	2	1	16	36	16	0.81	1	0	1	0	0	0	1	1	3	0	C/C	A/A	C/C	1	1	1	1	1
2	3	2	2	2	2	12	23	18	0.96	1	0	0	0	0	1	1	1	3	0	C/C	A/A	C/C	1	1	1	1	1
1	3	1	2	2	1	17	40	15	0.78	1	0	0	0	2	1	0	0	3	0	C/C	A/A	C/C	1	1	1	1	1
2	1	2	2	2	2	20	38	22	0.96	1	0	0	1	0	0	1	1	3	0	C/C	A/A	C/C	1	1	1	1	1
2	3	1	3	1	2	14	29	12	0.89	1	0	0	0	0	1	1	1	3	0	C/C	A/A	C/C	1	1	1	1	1
2	3	1	2	2	1	20	38	19	0.96	1	0	0	0	3	0	0	0	3	0	C/C	A/A	C/C	1	1	1	1	1
1	2	1	2	2	2	6	29	16	0.38	1	0	1	1	1	0	0	0	3	0	C/C	A/A	C/C	1	1	1	1	1
2	1	2	2	2	1	17	32	18	0.97	1	0	1	1	0	1	0	0	3	0	C/C	A/A	C/C	1	1	1	1	1
2	1	2	2	2	1	15	30	18	0.92	1	0	1	0	1	1	0	0	3	0	C/C	A/A	C/C	1	1	1	1	1
1	2	1	2	1	1	14	38	19	0.68	1	0	1	0	1	1	0	0	3	0	C/C	A/A	C/C	1	1	1	1	1
2	3	1	2	2	1	18	37	17	0.89	1	0	1	0	0	1	0	1	3	0	C/C	A/A	C/C	1	1	1	1	1
1	1	2	1	1	1	15	38	18	0.72	1	0	0	0	3	0	0	0	3	0	C/C	A/A	C/C	1	1	1	1	1
2	2	1	2	2	2	18	37	22	0.89	1	1	1	0	0	1	0	0	3	0	C/C	A/A	C/C	1	1	1	1	1
2	1	1	1	2	1	13	36	19	0.66	1	0	0	0	0	1	1	1	3	0	C/T	C/A	C/T	2	2	2	2	2
2	1	2	2	2	2	11	30	16	0.67	1	0	1	0	0	1	0	1	3	0	C/T	C/A	C/T	2	2	2	2	2
1	3	1	2	1	1	18	39	22	0.85	1	0	0	1	0	0	1	1	3	0	C/T	C/A	C/T	2	2	2	2	2
1	2	1	2	2	1	12	22	17	1	1	0	0	0	3	0	0	0	3	0	C/T	C/A	C/T	2	2	2	2	2
1	2	1	2	1	1	11	31	17	0.65	1	0	1	0	1	0	0	1	3	0	C/T	C/A	C/T	2	2	2	2	2
1	4	2	2	2	2	12	37	18	0.59	1	0	0	0	3	0	0	0	3	0	C/T	C/A	C/T	2	2	2	2	2
2	1	1	2	2	2	18	33	22	1	1	0	0	0	2	1	0	0	3	0	C/T	C/A	C/T	2	2	2	2	2
2	1	1	1	2	2	17	37	12	0.84	1	0	1	0	1	1	0	0	3	0	C/T	C/A	C/T	2	2	2	2	2
1	3	1	2	2	1	11	38	6	0.53	1	0	1	0	0	0	0	2	3	0	C/T	C/A	C/T	2	2	2	2	2
2	3	1	3	1	2	15	29	19	0.95	1	0	1	0	0	1	0	1	3	0	C/T	C/A	C/T	2	2	2	2	2
1	2	1	1	2	1	18	33	18	1	1	0	1	0	1	1	0	0	3	0	C/T	A/A	C/T	2	1	2	2	1
1	4	1	2	1	1	9	40	14	0.41	1	0	0	0	0	1	1	1	3	0	C/T	C/A	C/T	2	2	2	2	2
2	3	1	2	2	2	15	34	16	0.81	1	0	0	0	0	1	1	1	3	0	C/T	C/A	C/C	2	2	1	2	2
1	2	1	2	2	2	18	33	18	1	1	2	1	0	0	0	0	0	3	0	C/T	C/A	C/T	2	2	2	2	2
2	3	1	2	2	2	18	33	18	1	1	0	0	0	2	0	0	1	3	0	C/T	A/A	C/T	2	1	2	2	1
1	1	2	1	1	1	14	33	11	0.78	1	0	1	0	1	0	0	1	3	0	C/C	A/A	T/T	1	1	3	1	1
1	2	1	2	2	2	6	17	6	0.65	1	0	0	0	1	1	1	0	3	0	C/T	C/A	T/T	2	2	3	2	2
1	4	1	3	2	1	10	24	15	0.76	1	0	0	0	1	1	0	1	3	0	C/T	C/A	T/T	2	2	3	2	2
1	3	1	2	2	1	15	36	18	0.76	1	0	0	0	0	0	1	2	3	0	C/C	C/A	T/T	1	2	3	1	2
2	2	1	2	2	1	20	42	17	0.87	1	0	2	0	1	0	0	0	3	0	T/T	A/A	T/T	3	1	3	2	1
1	1	1	1	1	1	16	35	17	0.84	1	0	0	1	2	0	0	0	3	0	C/C	A/A	T/T	1	1	3	1	1
1	2	1	1	2	1	18	33	18	1	1	0	1	0	0	1	0	1	3	0	C/C	C/C	T/T	1	3	3	1	2
1	2	1	3	2	2	6	19	21	0.58	1	0	1	0	2	0	0	0	3	0	C/C	C/C	T/T	1	3	3	1	2
2	3	1	2	2	2	15	29	10	0.95	1	0	1	0	0	1	0	1	3	0	T/T	C/C	T/T	3	3	3	2	2
2	1	1	2	2	2	18	33	18	1	1	2	0	0	1	0	0	1	4	0	C/C	A/A	C/C	1	1	1	1	1
2	2	1	1	2	2	11	34	10	0.59	1	0	1	0	1	0	0	2	4	0	C/T	A/A	C/T	2	1	2	2	1
1	4	1	2	2	2	17	32	19	0.97	1	1	1	0	2	0	0	0	4	0	C/T	C/A	C/T	2	2	2	2	2
1	1	1	2	1	1	16	36	15	0.81	1	2	1	0	0	1	0	0	4	0	C/C	A/A	C/C	1	1	1	1	1
1	3	1	2	1	1	20	42	18	0.87	1	0	1	0	2	1	0	0	4	0	C/C	A/A	C/C	1	1	1	1	1
2	2	1	2	2	2	19	45	24	0.77	1	2	1	0	1	0	0	0	4	0	C/C	A/A	C/C	1	1	1	1	1
1	4	1	2	1	1	15	30	19	0.92	1	0	1	0	0	1	0	2	4	0	C/C	A/A	C/C	1	1	1	1	1
2	2	1	2	2	2	17	38	24	0.82	1	1	1	0	1	1	0	0	4	0	C/C	A/A	C/C	1	1	1	1	1
2	4	1	2	2	2	15	32	18	0.86	1	2	1	0	1	0	0	0	4	0	C/T	C/A	C/T	2	2	2	2	2
1	1	1	1	1	1	17	32	19	0.97	1	1	1	0	1	1	0	0	4	0	C/C	A/A	C/C	1	1	1	1	1
2	2	1	2	2	1	20	41	15	0.89	1	1	1	0	0	1	0	1	4	0	C/T	C/A	C/T	2	2	2	2	2
2	2	1	2	2	2	17	37	18	0.84	1	1	1	0	0	1	1	0	4	0	C/C	A/A	C/C	1	1	1	1	1
2	1	1	1	2	1	16	33	18	0.89	1	0	1	0	0	1	1	1	4	0	C/C	A/A	C/C	1	1	1	1	1
2	3	1	2	2	1	13	33	15	0.72	1	0	1	0	0	0	2	1	4	0	C/C	A/A	C/C	1	1	1	1	1
2	3	1	2	2	2	19	35	20	1	1	1	1	0	0	1	1	0	4	0	C/C	A/A	C/C	1	1	1	1	1
1	4	1	2	2	2	6	11	7	1	1	0	1	0	0	1	1	1	4	0	C/C	A/A	C/C	1	1	1	1	1
2	2	1	2	2	1	19	39	20	0.89	1	0	0	0	0	1	2	1	4	0	C/C	A/A	C/C	1	1	1	1	1
2	1	1	1	2	2	13	25	14	0.95	1	0	2	0	0	0	0	2	4	0	C/C	A/A	C/C	1	1	1	1	1
2	1	1	1	2	1	18	39	15	0.85	1	1	1	0	0	1	1	0	4	0	C/C	A/A	C/C	1	1	1	1	1
1	4	1	2	2	2	12	31	9	0.71	1	0	1	1	0	1	0	1	4	0	C/C	A/A	C/C	1	1	1	1	1
1	1	2	1	1	1	16	33	16	0.89	1	0	1	0	0	1	1	1	4	0	C/C	A/A	C/T	1	1	2	1	1
2	3	1	2	2	2	17	34	20	0.92	1	0	0	0	1	1	1	1	4	0	C/C	A/A	C/C	1	1	1	1	1
1	4	2	2	1	1	16	34	20	0.86	1	0	1	0	0	1	1	1	4	0	C/C	A/A	C/C	1	1	1	1	1
2	3	1	2	2	2	16	34	20	0.86	1	0	1	0	0	1	1	1	4	0	C/C	A/A	C/C	1	1	1	1	1
1	2	1	1	1	1	19	36	21	0.97	1	0	0	0	3	1	0	0	4	0	C/C	A/A	C/C	1	1	1	1	1
1	3	1	2	1	1	30	55	30	1	1	0	2	0	1	1	0	0	4	0	C/C	A/A	C/C	1	1	1	1	1
2	3	1	2	2	2	17	33	19	0.94	1	0	1	0	2	1	0	0	4	0	C/C	A/A	C/C	1	1	1	1	1
2	2	2	2	2	2	21	39	17	0.99	1	0	0	0	0	1	2	1	4	0	C/C	A/A	C/C	1	1	1	1	1
2	2	1	2	2	2	16	37	16	0.79	1	0	0	0	3	1	0	0	4	0	C/C	A/A	C/C	1	1	1	1	1
1	2	1	2	2	1	17	34	18	0.92	1	0	1	0	0	1	1	1	4	0	C/C	A/A	C/C	1	1	1	1	1
1	2	1	2	1	1	17	40	21	0.78	1	1	1	0	0	1	1	0	4	0	C/C	A/A	C/C	1	1	1	1	1
2	1	2	2	2	2	19	42	19	0.83	1	0	1	0	1	0	1	1	4	0	C/C	A/A	C/C	1	1	1	1	1
2	1	1	1	2	2	13	28	19	0.85	1	0	2	0	0	1	0	1	4	0	C/C	A/A	C/C	1	1	1	1	1
1	3	1	2	1	1	17	32	17	0.97	1	0	1	0	0	1	1	1	4	0	C/C	A/A	C/C	1	1	1	1	1
2	3	1	2	1	1	12	22	12	1	1	0	1	0	0	1	1	1	4	0	C/C	A/A	C/C	1	1	1	1	1
2	2	2	2	2	2	18	33	14	1	1	0	0	0	0	1	2	1	4	0	C/C	A/A	C/C	1	1	1	1	1
1	3	1	2	2	2	20	40	19	0.92	1	0	1	0	0	1	1	1	4	0	C/C	A/A	C/C	1	1	1	1	1
2	2	1	2	2	2	18	34	18	0.97	1	0	0	0	2	1	0	1	4	0	C/C	A/A	C/C	1	1	1	1	1
1	4	2	2	1	2	19	38	20	0.92	1	1	1	0	0	1	1	0	4	0	C/C	A/A	C/C	1	1	1	1	1
2	3	1	2	2	2	17	37	18	0.84	1	0	0	0	2	1	1	0	4	0	C/T	C/A	C/T	2	2	2	2	2
2	3	1	3	2	2	18	33	18	1	1	0	1	1	0	1	0	1	4	0	C/T	C/A	C/T	2	2	2	2	2
2	3	1	2	2	1	15	36	14	0.76	1	0	0	1	0	1	1	1	4	0	C/T	C/A	C/T	2	2	2	2	2
2	1	1	1	2	2	13	37	15	0.64	1	0	0	0	1	1	1	1	4	0	C/T	C/A	C/T	2	2	2	2	2
2	3	1	2	2	2	18	33	18	1	1	0	1	0	0	1	1	1	4	0	C/T	C/A	C/T	2	2	2	2	2
1	4	1	2	1	1	16	34	13	0.86	1	0	1	0	0	1	1	1	4	0	C/T	C/A	C/C	2	2	1	2	2
1	2	2	2	1	1	10	29	13	0.63	1	0	1	0	0	2	0	1	4	0	C/T	C/A	C/T	2	2	2	2	2
2	3	1	2	2	2	19	42	15	0.83	1	0	1	0	0	1	1	1	4	0	C/T	C/A	C/T	2	2	2	2	2
2	1	1	2	2	1	18	33	18	1	1	0	1	0	2	0	0	1	4	0	C/T	C/A	C/T	2	2	2	2	2
1	3	1	2	2	1	17	41	23	0.76	1	0	0	0	3	0	0	1	4	0	C/T	C/A	C/T	2	2	2	2	2
1	2	1	2	1	2	18	35	18	0.94	1	0	1	1	0	1	0	1	4	0	C/T	C/A	C/T	2	2	2	2	2
1	4	1	2	1	1	11	39	6	0.52	1	2	1	0	1	0	0	0	4	0	C/T	C/A	C/T	2	2	2	2	2
2	2	1	2	2	2	19	39	19	0.89	1	1	1	0	0	1	1	0	4	0	C/T	C/A	C/T	2	2	2	2	2
1	4	2	2	1	1	23	43	20	0.98	1	1	0	0	1	1	1	0	4	0	C/T	C/A	C/T	2	2	2	2	2
1	3	1	2	1	2	12	32	12	0.69	1	1	0	0	0	1	1	1	4	0	C/T	C/A	C/T	2	2	2	2	2
2	2	1	2	2	2	17	37	18	0.84	1	0	1	0	0	1	1	1	4	0	C/T	C/A	C/T	2	2	2	2	2
2	3	1	2	2	2	19	36	20	0.97	1	1	1	0	0	0	1	1	4	0	C/T	C/A	C/T	2	2	2	2	2
2	3	1	2	2	1	18	33	18	1	1	0	1	0	2	1	0	0	4	0	C/T	C/A	T/T	2	2	3	2	2
2	2	1	2	2	1	17	36	20	0.87	1	0	1	0	0	1	1	1	4	0	T/T	A/A	T/T	3	1	3	2	1
2	3	1	3	2	2	20	41	25	0.89	1	0	1	0	0	1	1	1	4	0	C/T	C/C	C/T	2	3	2	2	2
2	1	1	2	2	2	14	40	19	0.64	1	0	1	0	3	0	0	0	4	0	C/C	C/C	T/T	1	3	3	1	2
2	3	1	2	2	2	14	33	14	0.78	1	0	1	1	0	1	0	1	4	0	C/C	C/C	T/T	1	3	3	1	2
2	3	1	3	1	1	19	36	18	0.97	1	0	1	0	2	1	0	0	4	0	T/T	C/C	T/T	3	3	3	2	2
2	1	1	1	2	2	18	39	19	0.85	1	1	1	0	1	1	0	0	4	0	T/T	C/C	T/T	3	3	3	2	2
1	2	1	2	1	1	22	34	21	1.19	2	0	0	0	0	0	0	0	0	0	C/C	A/A	C/C	1	1	1	1	1
1	1	1	1	1	1	21	35	19	1.1	2	0	0	0	0	0	0	0	0	0	C/C	A/A	C/C	1	1	1	1	1
1	2	2	2	2	2	19	22	16	1.58	2	0	0	0	0	0	0	0	0	0	C/C	A/A	C/C	1	1	1	1	1
1	4	1	2	1	1	20	33	19	1.11	2	0	0	0	0	0	0	0	0	0	C/C	A/A	C/C	1	1	1	1	1
1	2	1	2	2	1	19	33	18	1.06	2	0	0	0	0	0	0	0	0	0	C/C	A/A	C/C	1	1	1	1	1
1	2	1	1	1	1	26	33	18	1.44	2	0	0	0	0	0	0	0	0	0	C/C	A/A	C/C	1	1	1	1	1
1	1	2	2	1	1	24	43	23	1.02	2	0	0	0	0	0	0	0	0	0	C/C	A/A	C/C	1	1	1	1	1
1	4	2	2	2	1	22	37	21	1.09	2	0	0	0	0	0	0	0	0	0	C/C	A/A	C/C	1	1	1	1	1
1	3	2	2	1	1	23	34	22	1.24	2	0	0	0	0	0	0	0	0	0	C/T	C/A	C/T	2	2	2	2	2
1	4	1	2	2	1	13	19	15	1.25	2	0	0	0	0	0	0	0	0	0	C/T	C/A	C/T	2	2	2	2	2
1	1	1	2	2	1	23	35	22	1.2	2	0	0	0	0	0	0	0	0	0	C/T	C/A	C/T	2	2	2	2	2
1	3	1	2	2	1	22	31	19	1.3	2	0	0	0	0	0	0	0	0	0	C/T	C/A	C/T	2	2	2	2	2
1	2	1	2	2	1	19	29	20	1.2	2	0	0	0	0	0	0	0	0	0	C/T	C/A	T/T	2	2	3	2	2
1	1	2	2	2	2	23	34	30	1.24	2	0	1	0	0	0	0	0	1	0	C/C	A/A	C/C	1	1	1	1	1
1	2	1	2	2	2	20	28	17	1.31	2	0	1	0	0	0	0	0	1	0	C/C	A/A	C/C	1	1	1	1	1
1	3	1	2	2	1	18	32	20	1.03	2	0	1	0	0	0	0	0	1	0	C/C	A/A	C/C	1	1	1	1	1
1	3	2	2	1	1	21	33	17	1.17	2	0	1	0	0	0	0	0	1	0	C/C	A/A	C/C	1	1	1	1	1
1	2	2	2	1	2	30	50	24	1.1	2	0	1	0	0	0	0	0	1	0	C/C	A/A	C/C	1	1	1	1	1
1	2	2	2	2	1	24	39	26	1.13	2	0	1	0	0	0	0	0	1	0	C/C	A/A	C/T	1	1	2	1	1
1	2	1	2	1	1	23	37	17	1.14	2	0	1	0	0	0	0	0	1	0	C/C	A/A	C/C	1	1	1	1	1
1	1	1	1	1	1	24	41	24	1.07	2	0	1	0	0	0	0	0	1	0	C/C	A/A	C/C	1	1	1	1	1
1	2	1	1	1	1	24	42	23	1.05	2	0	1	0	0	0	0	0	1	0	C/C	A/A	C/C	1	1	1	1	1
2	1	2	2	2	2	24	29	24	1.52	2	0	0	0	0	1	0	0	1	0	C/C	A/A	C/C	1	1	1	1	1
1	1	1	1	1	1	29	37	22	1.44	2	0	0	0	0	0	0	1	1	0	C/C	A/A	C/C	1	1	1	1	1
2	2	1	2	2	2	21	32	14	1.2	2	0	0	0	0	1	0	0	1	0	C/C	A/A	C/C	1	1	1	1	1
2	3	1	2	2	1	17	28	21	1.11	2	0	0	0	0	1	0	0	1	0	C/C	A/A	C/C	1	1	1	1	1
1	3	1	2	2	2	22	33	18	1.22	2	0	1	0	0	0	0	0	1	0	C/C	A/A	C/C	1	1	1	1	1
1	2	1	2	2	2	19	30	17	1.16	2	0	1	0	0	0	0	0	1	0	C/C	A/A	C/T	1	1	2	1	1
1	4	1	2	1	2	27	35	22	1.41	2	0	1	0	0	0	0	0	1	0	C/C	A/A	C/C	1	1	1	1	1
1	3	1	2	1	1	17	28	8	1.11	2	0	1	0	0	0	0	0	1	0	C/C	A/A	C/C	1	1	1	1	1
1	2	1	3	1	1	20	36	17	1.02	2	0	1	0	0	0	0	0	1	0	C/C	A/A	C/C	1	1	1	1	1
1	3	2	2	1	2	30	43	6	1.28	2	0	1	0	0	0	0	0	1	0	C/T	C/A	C/T	2	2	2	2	2
2	1	1	1	2	2	20	35	19	1.05	2	0	0	0	0	1	0	0	1	0	C/T	C/A	C/T	2	2	2	2	2
2	3	2	2	2	2	20	33	18	1.11	2	0	0	0	0	1	0	0	1	0	C/T	C/A	C/T	2	2	2	2	2
1	1	2	2	1	1	22	34	20	1.19	2	0	1	0	0	0	0	0	1	0	C/T	A/A	C/T	2	1	2	2	1
1	1	1	1	2	2	23	42	24	1	2	0	1	0	0	0	0	0	1	0	C/T	C/A	C/T	2	2	2	2	2
1	3	1	2	1	1	29	31	18	1.72	2	0	1	0	0	0	0	0	1	0	C/T	C/A	C/T	2	2	2	2	2
1	1	2	2	1	1	24	31	18	1.42	2	0	1	0	0	0	0	0	1	0	C/T	C/A	C/T	2	2	2	2	2
2	3	1	2	2	2	19	33	20	1.06	2	0	1	0	0	0	0	0	1	0	C/T	C/A	C/T	2	2	2	2	2
2	3	2	2	2	2	16	26	16	1.13	2	0	1	0	0	0	0	0	1	0	C/T	C/A	C/T	2	2	2	2	2
1	2	2	2	1	1	15	25	13	1.1	2	0	1	0	0	0	0	0	1	0	C/T	C/A	C/T	2	2	2	2	2
1	2	2	2	1	2	30	23	11	2.39	2	0	1	0	0	0	0	0	1	0	C/T	C/A	T/T	2	2	3	2	2
1	3	2	2	1	1	22	36	21	1.12	2	0	0	0	0	0	0	1	1	0	C/T	C/A	T/T	2	2	3	2	2
1	3	1	2	2	2	7	11	11	1.17	2	0	1	0	0	0	0	0	1	0	T/T	C/C	T/T	3	3	3	2	2
1	1	1	1	2	2	19	33	21	1.06	2	0	1	0	0	0	0	1	2	0	C/C	A/A	C/C	1	1	1	1	1
2	1	1	2	2	2	19	33	18	1.06	2	0	1	0	0	1	0	0	2	0	C/C	A/A	C/C	1	1	1	1	1
2	2	1	2	2	1	20	21	16	1.75	2	1	0	0	0	0	1	0	2	0	C/C	A/A	C/T	1	1	2	1	1
2	2	2	2	2	2	17	28	20	1.11	2	0	1	0	0	0	0	1	2	0	C/C	A/A	C/C	1	1	1	1	1
1	1	1	2	1	1	30	43	12	1.28	2	0	0	0	1	1	0	0	2	0	C/C	A/A	C/T	1	1	2	1	1
1	1	1	1	1	1	22	40	20	1.01	2	0	0	0	0	1	1	0	2	0	C/C	A/A	C/C	1	1	1	1	1
2	1	2	1	2	2	20	32	16	1.15	2	0	0	0	1	1	0	0	2	0	C/C	A/A	C/C	1	1	1	1	1
2	2	1	2	2	1	23	40	20	1.05	2	0	1	0	0	1	0	0	2	0	C/C	A/A	C/C	1	1	1	1	1
1	2	1	2	1	1	18	30	17	1.1	2	0	1	0	0	0	0	1	2	0	C/C	A/A	C/C	1	1	1	1	1
2	4	1	2	2	2	20	32	18	1.15	2	0	1	1	0	0	0	0	2	0	C/C	A/A	C/C	1	1	1	1	1
1	4	1	2	1	1	20	35	19	1.05	2	0	1	0	0	1	0	0	2	0	C/C	A/A	C/C	1	1	1	1	1
1	1	1	2	2	2	30	39	14	1.41	2	0	1	0	0	0	0	1	2	0	C/C	A/A	C/C	1	1	1	1	1
1	2	1	2	2	1	24	35	21	1.26	2	0	0	0	1	0	1	0	2	0	C/C	A/A	C/C	1	1	1	1	1
1	1	1	1	1	1	24	35	18	1.26	2	0	0	0	2	0	0	0	2	0	C/C	A/A	C/C	1	1	1	1	1
1	4	1	2	1	1	20	36	21	1.02	2	0	1	0	0	1	0	0	2	0	C/C	A/A	C/C	1	1	1	1	1
1	3	1	2	1	1	22	33	16	1.22	2	0	1	0	1	0	0	0	2	0	C/C	A/A	C/C	1	1	1	1	1
1	2	1	1	2	1	28	32	22	1.6	2	0	0	0	1	1	0	0	2	0	C/T	C/A	C/T	2	2	2	2	2
1	2	2	2	2	2	19	34	20	1.02	2	0	1	0	0	0	0	1	2	0	C/T	C/A	C/T	2	2	2	2	2
2	1	2	2	2	2	15	23	6	1.2	2	0	1	0	1	0	0	0	2	0	C/T	C/A	C/T	2	2	2	2	2
1	4	1	2	1	1	23	35	19	1.2	2	0	1	0	0	1	0	0	2	0	C/T	C/A	C/T	2	2	2	2	2
2	2	1	2	2	2	21	32	15	1.2	2	0	0	0	0	1	0	1	2	0	C/T	C/A	C/T	2	2	2	2	2
2	2	1	2	2	2	16	26	17	1.13	2	0	1	0	1	0	0	0	2	0	C/T	C/A	C/T	2	2	2	2	2
1	2	1	2	1	1	20	30	28	1.22	2	0	1	0	0	0	0	1	2	0	C/T	C/A	C/T	2	2	2	2	2
2	3	1	2	2	2	19	31	20	1.12	2	0	1	0	0	1	0	0	2	0	C/T	C/A	C/T	2	2	2	2	2
2	2	1	2	2	2	21	38	17	1.01	2	0	1	0	0	1	0	0	2	0	C/T	C/A	C/T	2	2	2	2	2
2	3	2	2	2	2	16	26	11	1.13	2	0	1	0	0	1	0	0	2	0	C/T	C/A	C/T	2	2	2	2	2
2	2	1	2	2	1	22	32	18	1.26	2	0	1	0	0	0	0	1	2	0	C/T	C/A	C/T	2	2	2	2	2
1	3	2	2	2	2	19	33	20	1.06	2	0	1	0	0	1	0	0	2	0	C/T	C/A	C/T	2	2	2	2	2
2	3	1	2	1	1	20	31	16	1.18	2	0	1	0	0	0	0	1	2	0	C/T	C/A	C/T	2	2	2	2	2
1	3	2	2	1	1	30	23	7	2.39	2	0	1	0	0	0	0	1	2	0	C/T	A/A	C/T	2	1	2	2	1
1	4	2	2	2	2	25	42	21	1.09	2	0	0	1	0	0	0	1	2	0	C/T	C/A	T/T	2	2	3	2	2
1	2	1	2	1	1	22	35	18	1.15	2	0	1	1	0	0	0	0	2	0	T/T	A/A	T/T	3	1	3	2	1
1	3	1	2	2	1	14	25	16	1.03	2	0	1	0	0	0	0	1	2	0	T/T	A/A	T/T	3	1	3	2	1
1	1	1	1	1	1	20	29	17	1.26	2	0	0	0	0	1	0	1	2	0	C/T	C/C	C/T	2	3	2	2	2
2	3	1	3	2	2	14	22	11	1.17	2	0	1	0	0	1	0	0	2	0	T/T	C/C	T/T	3	3	3	2	2
2	3	1	2	2	2	18	28	17	1.18	2	0	0	1	0	0	0	1	2	0	T/T	C/C	T/T	3	3	3	2	2
1	2	2	2	1	1	30	23	6	2.39	2	0	1	0	1	0	0	0	2	0	T/T	C/C	T/T	3	3	3	2	2
1	4	1	2	1	2	19	26	18	1.34	2	2	0	0	1	0	0	0	3	0	C/C	A/A	C/C	1	1	1	1	1
1	2	1	2	2	1	30	36	18	1.53	2	1	0	0	2	0	0	0	3	0	C/T	C/A	C/T	2	2	2	2	2
1	2	1	3	1	1	25	41	24	1.12	2	2	0	0	0	1	0	0	3	0	C/C	A/A	C/C	1	1	1	1	1
1	2	1	2	2	1	20	32	16	1.15	2	1	0	1	0	0	0	1	3	0	C/C	C/A	C/C	1	2	1	1	2
2	3	1	2	2	1	27	38	25	1.3	2	0	0	1	0	1	0	1	3	0	C/T	C/A	C/T	2	2	2	2	2
1	2	1	2	2	2	26	33	18	1.44	2	0	1	0	1	1	0	0	3	0	C/C	A/A	C/C	1	1	1	1	1
2	1	1	2	2	2	21	36	23	1.07	2	0	1	0	1	0	0	1	3	0	C/C	A/A	C/T	1	1	2	1	1
2	1	1	1	1	2	16	23	12	1.28	2	0	0	0	0	1	1	1	3	0	C/C	A/A	C/C	1	1	1	1	1
2	2	1	2	2	1	20	32	17	1.15	2	0	1	0	0	1	0	1	3	0	C/C	A/A	C/C	1	1	1	1	1
1	2	1	2	1	2	22	33	18	1.22	2	0	1	0	1	1	0	0	3	0	C/C	A/A	C/T	1	1	2	1	1
1	1	1	1	1	1	22	31	18	1.3	2	0	1	0	0	2	0	0	3	0	C/C	A/A	C/C	1	1	1	1	1
2	3	1	2	2	1	21	30	19	1.28	2	0	0	0	0	1	1	1	3	0	C/C	A/A	C/C	1	1	1	1	1
1	1	2	2	1	1	22	29	21	1.39	2	0	1	1	0	1	0	0	3	0	C/C	A/A	C/C	1	1	1	1	1
2	3	1	2	2	2	20	32	19	1.15	2	0	1	0	2	0	0	0	3	0	C/C	A/A	C/C	1	1	1	1	1
1	4	1	2	1	1	23	32	20	1.32	2	0	1	0	0	1	0	1	3	0	C/C	A/A	C/C	1	1	1	1	1
2	2	1	2	2	1	27	38	19	1.3	2	0	0	0	0	1	1	1	3	0	C/C	A/A	C/C	1	1	1	1	1
1	2	1	2	1	1	19	29	19	1.2	2	0	1	0	0	0	1	1	3	0	C/C	A/A	C/C	1	1	1	1	1
1	2	1	2	2	1	18	29	19	1.14	2	0	0	1	0	1	0	1	3	0	C/C	A/A	C/C	1	1	1	1	1
1	3	1	2	1	1	20	33	10	1.11	2	0	1	2	0	0	0	0	3	0	C/C	A/A	C/T	1	1	2	1	1
1	3	1	2	1	1	24	36	20	1.22	2	0	0	1	0	1	0	1	3	0	C/C	A/A	C/T	1	1	2	1	1
1	1	1	1	2	2	20	36	16	1.02	2	0	0	0	0	0	2	1	3	0	C/T	C/A	C/T	2	2	2	2	2
1	1	1	1	1	1	25	31	18	1.48	2	0	2	0	0	1	0	0	3	0	C/T	C/A	C/T	2	2	2	2	2
1	4	1	2	1	2	18	32	19	1.03	2	0	1	0	1	1	0	0	3	0	C/T	C/A	C/T	2	2	2	2	2
2	3	1	2	2	2	20	29	16	1.26	2	0	1	0	0	1	0	1	3	0	C/T	C/A	C/T	2	2	2	2	2
1	1	1	2	1	1	30	43	12	1.28	2	0	2	0	0	1	0	0	3	0	C/T	C/A	C/T	2	2	2	2	2
1	1	1	1	2	1	20	29	20	1.26	2	0	1	0	2	0	0	0	3	0	C/T	C/A	C/T	2	2	2	2	2
1	1	1	2	1	1	23	36	18	1.17	2	0	1	1	0	1	0	0	3	0	C/T	C/A	C/T	2	2	2	2	2
1	1	1	2	1	1	18	32	19	1.03	2	0	0	0	0	1	1	1	3	0	C/T	C/A	C/T	2	2	2	2	2
1	1	1	2	1	2	23	36	18	1.17	2	1	1	0	0	0	1	0	3	0	C/T	C/A	C/T	2	2	2	2	2
2	2	1	2	2	2	20	33	18	1.11	2	0	0	0	0	1	1	1	3	0	C/T	C/A	C/T	2	2	2	2	2
2	2	1	2	2	1	24	36	20	1.22	2	0	0	0	0	0	2	1	3	0	C/T	C/A	T/T	2	2	3	2	2
1	2	1	2	1	1	19	32	14	1.09	2	0	1	0	0	0	1	1	3	0	C/T	C/A	T/T	2	2	3	2	2
1	1	1	3	2	2	28	35	16	1.47	2	0	1	0	2	0	0	0	3	0	C/T	C/A	T/T	2	2	3	2	2
1	1	1	1	2	2	19	33	18	1.06	2	0	1	0	0	1	0	1	3	0	T/T	C/C	T/T	3	3	3	2	2
2	1	1	2	2	2	30	31	18	1.77	2	2	1	0	0	1	0	0	4	0	C/C	A/A	C/C	1	1	1	1	1
2	2	2	2	1	1	24	33	21	1.33	2	2	0	0	1	0	0	1	4	0	C/C	A/A	C/C	1	1	1	1	1
2	2	2	2	2	1	21	36	20	1.07	2	0	0	0	2	0	1	1	4	0	C/C	A/A	C/C	1	1	1	1	1
2	3	1	2	2	1	21	36	25	1.07	2	2	0	0	0	0	1	1	4	0	C/C	A/A	C/C	1	1	1	1	1
1	4	1	2	1	2	11	20	15	1.01	2	1	1	0	1	1	0	0	4	0	C/C	A/A	C/C	1	1	1	1	1
2	3	1	2	2	2	20	35	24	1.05	2	0	1	0	1	2	0	0	4	0	C/C	A/A	C/C	1	1	1	1	1
1	2	1	2	2	1	21	35	18	1.1	2	1	0	0	0	1	1	1	4	0	C/C	A/A	C/C	1	1	1	1	1
1	3	2	2	1	2	21	34	18	1.13	2	1	1	0	1	0	0	1	4	0	C/C	A/A	C/C	1	1	1	1	1
2	4	2	2	2	1	26	37	19	1.29	2	0	0	0	1	1	1	1	4	0	C/C	A/A	C/C	1	1	1	1	1
2	1	1	1	2	1	16	23	12	1.28	2	0	1	0	0	1	1	1	4	0	C/C	A/A	C/C	1	1	1	1	1
1	4	1	2	1	1	25	38	15	1.21	2	0	1	2	0	1	0	0	4	0	C/C	A/A	C/C	1	1	1	1	1
1	1	2	2	1	1	18	31	18	1.06	2	3	1	0	0	0	0	0	4	0	C/C	A/A	C/T	1	1	2	1	1
2	2	1	2	2	2	20	34	17	1.08	2	0	0	0	3	1	0	0	4	0	C/C	A/A	C/C	1	1	1	1	1
2	3	1	2	2	1	27	36	26	1.37	2	0	2	0	0	0	1	1	4	0	C/C	A/A	C/C	1	1	1	1	1
1	3	1	2	2	2	23	25	22	1.69	2	0	1	3	0	0	0	0	4	0	C/C	A/A	C/C	1	1	1	1	1
1	3	1	2	1	1	23	30	18	1.41	2	0	2	0	0	1	0	1	4	0	C/C	A/A	C/T	1	1	2	1	1
2	3	1	2	2	2	22	35	25	1.15	2	0	1	0	0	0	1	2	4	0	C/C	A/A	C/C	1	1	1	1	1
2	2	1	2	2	2	24	36	23	1.22	2	0	1	0	0	1	1	1	4	0	C/C	A/A	C/C	1	1	1	1	1
1	3	1	3	1	1	20	35	20	1.05	2	0	1	0	0	1	1	1	4	0	C/C	A/A	C/C	1	1	1	1	1
1	3	1	2	1	1	16	29	12	1.01	2	0	1	0	0	1	1	1	4	0	C/C	A/A	C/C	1	1	1	1	1
2	2	2	1	1	2	20	27	14	1.36	2	0	2	1	0	1	0	0	4	0	C/C	A/A	C/C	1	1	1	1	1
2	1	1	1	2	1	17	31	18	1.01	2	1	1	0	0	1	1	0	4	0	C/C	A/A	C/C	1	1	1	1	1
2	2	1	2	1	1	24	40	26	1.1	2	1	1	0	0	1	1	0	4	0	C/C	A/A	C/T	1	1	2	1	1
1	3	1	2	2	2	19	31	18	1.12	2	1	1	0	0	1	1	0	4	0	C/C	C/A	C/T	1	2	2	1	2
1	2	1	2	1	1	20	25	16	1.47	2	1	0	0	0	1	1	1	4	0	C/T	C/A	C/T	2	2	2	2	2
1	4	1	2	1	1	19	33	22	1.06	2	0	1	0	0	1	1	1	4	0	C/T	C/A	C/T	2	2	2	2	2
2	1	1	1	2	2	21	36	20	1.07	2	0	1	0	0	1	1	1	4	0	C/T	C/A	C/T	2	2	2	2	2
1	3	1	2	1	1	20	27	19	1.36	2	0	1	0	0	1	1	1	4	0	C/T	C/A	C/T	2	2	2	2	2
2	2	1	2	2	2	21	27	18	1.43	2	0	1	0	0	1	1	1	4	0	C/T	C/A	C/T	2	2	2	2	2
2	2	1	2	2	2	27	37	24	1.34	2	0	0	0	0	0	3	1	4	0	C/T	C/A	C/T	2	2	2	2	2
2	2	1	2	2	2	17	31	17	1.01	2	0	0	0	0	1	1	2	4	0	C/T	C/A	C/T	2	2	2	2	2
2	3	1	2	2	2	17	31	17	1.01	2	0	0	0	0	1	1	2	4	0	C/T	C/A	C/T	2	2	2	2	2
1	3	1	1	1	1	20	35	22	1.05	2	1	1	0	0	1	1	0	4	0	C/T	C/A	C/T	2	2	2	2	2
1	3	1	2	2	2	17	29	18	1.07	2	0	1	0	0	1	1	1	4	0	C/T	C/A	C/T	2	2	2	2	2
2	2	2	2	2	1	25	35	17	1.31	2	0	0	1	0	0	2	1	4	0	C/T	C/A	C/T	2	2	2	2	2
1	4	2	2	1	1	16	29	10	1.01	2	0	0	0	0	1	2	1	4	0	C/T	C/A	C/T	2	2	2	2	2
1	4	1	2	1	1	15	22	8	1.25	2	0	1	0	0	1	1	1	4	0	C/T	C/A	C/T	2	2	2	2	2
1	4	2	2	2	1	19	34	20	1.02	2	1	1	0	0	1	1	0	4	0	C/T	C/A	T/T	2	2	3	2	2
2	4	2	2	2	2	24	35	21	1.26	2	0	0	1	0	1	1	1	4	0	T/T	C/C	C/T	3	3	2	2	2
1	2	1	2	1	1	20	36	11	1.02	2	0	1	0	0	1	1	1	4	0	T/T	C/C	T/T	3	3	3	2	2
2	2	1	2	2	1	21	37	20	1.04	2	0	0	0	0	1	2	1	4	0	T/T	C/C	T/T	3	3	3	2	2
2	1	1	1	2	2	24	34	24	1.29	2	0	0	0	0	1	2	1	4	0	T/T	C/C	T/T	3	3	3	2	2
1	1	2	1	1	1	15	36	15	0.76	1	1	1	0	1	2	0	0	5	1	T/T	C/C	T/T	3	3	3	2	2
2	1	1	1	2	2	19	37	18	0.94	1	4	1	0	0	0	0	0	5	1	C/C	A/A	C/C	1	1	1	1	1
2	2	1	1	2	1	19	39	20	0.89	1	1	0	1	2	0	0	1	5	1	C/C	A/A	C/C	1	1	1	1	1
2	3	1	2	2	2	12	30	9	0.73	1	1	0	0	2	1	0	1	5	1	C/C	A/A	C/C	1	1	1	1	1
2	3	1	2	1	1	18	33	18	1	1	2	1	1	0	0	0	1	5	1	C/T	C/A	T/T	2	2	3	2	2
2	3	1	2	2	1	18	41	17	0.8	1	1	1	0	0	1	1	1	5	1	C/C	A/A	C/C	1	1	1	1	1
1	2	1	2	2	1	15	39	21	0.71	1	1	0	0	1	2	0	1	5	1	C/T	C/A	C/T	2	2	2	2	2
2	2	1	2	2	2	19	37	24	0.94	1	0	2	0	1	0	1	1	5	1	C/T	C/A	C/T	2	2	2	2	2
1	1	1	1	2	1	17	35	18	0.89	1	1	1	0	0	1	1	1	5	1	C/T	C/A	C/T	2	2	2	2	2
1	3	1	2	1	1	22	44	24	0.92	1	1	1	1	1	0	1	0	5	1	C/C	C/C	T/T	1	3	3	1	2
1	3	1	2	1	1	18	39	22	0.85	1	1	0	0	3	0	1	0	5	1	C/C	A/A	C/C	1	1	1	1	1
2	1	1	2	2	2	18	33	20	1	1	1	1	0	2	1	0	0	5	1	C/C	A/A	C/C	1	1	1	1	1
2	4	2	2	2	2	19	35	17	1	1	0	1	0	0	1	2	1	5	1	C/C	A/A	C/C	1	1	1	1	1
1	3	1	2	1	1	19	41	20	0.85	1	0	1	0	0	1	2	1	5	1	C/C	A/A	C/C	1	1	1	1	1
1	4	1	2	1	1	16	32	19	0.92	1	0	1	0	0	1	1	2	5	1	C/C	A/A	C/C	1	1	1	1	1
2	3	1	2	2	2	14	26	14	0.99	1	1	1	0	0	1	1	1	5	1	C/C	A/A	C/T	1	1	2	1	1
1	2	2	2	1	1	19	40	19	0.87	1	1	1	0	0	1	1	1	5	1	C/C	A/A	C/C	1	1	1	1	1
1	3	2	2	1	1	15	31	17	0.89	1	0	2	0	1	1	0	1	5	1	C/C	A/A	C/C	1	1	1	1	1
2	3	2	2	2	1	14	32	17	0.8	1	0	2	0	0	1	1	1	5	1	C/C	A/A	C/C	1	1	1	1	1
1	2	2	2	2	1	18	39	9	0.85	1	0	1	0	2	1	0	1	5	1	C/C	A/A	C/T	1	1	2	1	1
2	1	1	1	2	2	17	39	24	0.8	1	0	0	0	0	1	2	2	5	1	C/C	A/A	C/T	1	1	2	1	1
2	2	1	2	2	2	20	39	17	0.94	1	0	0	0	0	1	2	2	5	1	C/C	A/A	C/C	1	1	1	1	1
2	4	1	2	2	2	20	42	25	0.87	1	1	1	0	2	1	0	0	5	1	C/C	A/A	C/C	1	1	1	1	1
1	3	1	2	2	1	16	37	21	0.79	1	0	1	0	0	1	2	1	5	1	C/C	A/A	C/C	1	1	1	1	1
1	3	1	2	1	1	14	26	15	0.99	1	0	1	0	2	1	1	0	5	1	C/C	C/A	C/C	1	2	1	1	2
1	3	1	2	2	2	17	37	16	0.84	1	0	1	0	3	1	0	0	5	1	T/T	A/A	C/C	3	1	1	2	1
2	3	1	2	2	2	13	37	18	0.64	1	0	1	1	0	2	0	1	5	1	C/C	A/A	C/C	1	1	1	1	1
1	1	2	2	1	1	12	32	19	0.69	1	0	1	1	0	1	1	1	5	1	C/C	A/A	C/C	1	1	1	1	1
1	2	1	1	1	1	20	37	17	0.99	1	0	1	0	0	1	2	1	5	1	C/C	A/A	C/C	1	1	1	1	1
2	2	1	2	2	2	17	36	18	0.87	1	1	1	0	0	1	1	1	5	1	C/C	A/A	C/C	1	1	1	1	1
1	3	1	2	1	1	13	27	14	0.88	1	0	1	0	2	1	1	0	5	1	C/T	C/A	C/T	2	2	2	2	2
1	2	2	1	1	1	12	24	15	0.92	1	1	1	1	0	0	1	1	5	1	C/T	C/A	C/T	2	2	2	2	2
2	3	1	3	2	2	13	40	16	0.6	1	0	1	2	0	1	0	1	5	1	C/T	C/A	C/T	2	2	2	2	2
1	2	1	2	1	1	16	36	18	0.81	1	0	0	0	0	1	2	2	5	1	C/T	C/A	C/T	2	2	2	2	2
2	2	1	2	2	2	19	42	18	0.83	1	0	1	0	1	1	1	1	5	1	C/T	C/A	C/T	2	2	2	2	2
2	1	1	2	1	2	15	36	15	0.76	1	0	1	0	0	1	1	2	5	1	C/T	C/A	C/T	2	2	2	2	2
2	4	2	2	2	2	19	36	25	0.97	1	0	2	0	0	1	1	1	5	1	C/T	C/A	C/T	2	2	2	2	2
1	4	1	2	2	1	17	36	16	0.87	1	0	1	1	0	1	1	1	5	1	C/T	C/A	C/T	2	2	2	2	2
2	2	2	2	2	1	17	39	20	0.8	1	2	0	0	0	1	1	1	5	1	C/T	A/A	C/T	2	1	2	2	1
1	2	1	2	1	1	22	43	19	0.94	1	1	1	0	1	1	0	1	5	1	C/T	C/A	C/T	2	2	2	2	2
1	3	1	2	1	1	16	30	17	0.98	1	1	1	0	0	1	1	1	5	1	C/T	C/A	C/T	2	2	2	2	2
1	1	1	1	1	1	19	39	19	0.89	1	0	0	1	0	1	1	2	5	1	C/T	C/A	T/T	2	2	3	2	2
2	2	1	2	2	2	18	35	21	0.94	1	0	1	0	3	1	0	0	5	1	C/T	C/A	T/T	2	2	3	2	2
1	4	1	2	2	2	17	32	19	0.97	1	2	1	0	1	1	0	1	6	1	C/C	A/A	C/C	1	1	1	1	1
1	1	1	1	1	1	19	35	20	1	1	2	1	0	0	1	0	2	6	1	C/C	A/A	C/C	1	1	1	1	1
1	1	1	2	2	1	18	33	18	1	1	2	1	0	3	0	0	0	6	1	C/T	C/A	C/T	2	2	2	2	2
1	1	2	1	1	1	21	40	13	0.96	1	2	3	0	0	0	0	1	6	1	C/T	C/A	C/T	2	2	2	2	2
1	1	2	2	1	2	8	31	16	0.47	1	2	1	0	0	2	0	1	6	1	C/T	C/A	C/T	2	2	2	2	2
2	3	1	2	2	2	16	34	15	0.86	1	1	1	0	1	1	0	2	6	1	C/C	A/A	C/C	1	1	1	1	1
1	2	2	3	1	1	7	26	15	0.49	1	2	1	1	1	0	0	1	6	1	C/T	C/A	C/T	2	2	2	2	2
2	1	2	2	2	2	11	36	14	0.56	1	2	1	0	2	1	0	0	6	1	C/T	C/A	C/T	2	2	2	2	2
1	2	2	1	2	2	11	39	10	0.52	1	1	1	0	3	0	0	1	6	1	C/T	C/A	C/T	2	2	2	2	2
2	1	1	2	2	1	17	34	17	0.92	1	1	1	0	1	1	0	2	6	1	C/T	C/A	C/C	2	2	1	2	2
1	1	1	1	1	2	9	27	6	0.61	1	1	1	0	1	2	0	1	6	1	C/C	A/A	C/T	1	1	2	1	1
2	3	1	2	2	1	15	42	30	0.65	1	2	1	1	1	0	0	1	6	1	C/C	A/A	C/C	1	1	1	1	1
1	1	1	1	1	1	13	38	13	0.63	1	1	1	0	1	2	0	1	6	1	C/C	A/A	C/C	1	1	1	1	1
2	3	1	2	2	2	17	33	23	0.94	1	2	1	0	1	0	0	2	6	1	C/T	C/A	C/T	2	2	2	2	2
1	4	1	2	2	2	6	23	6	0.48	1	2	2	0	0	1	0	1	6	1	C/T	C/A	C/T	2	2	2	2	2
2	2	1	2	2	2	17	33	18	0.94	1	1	1	0	1	1	1	1	6	1	C/C	A/A	C/C	1	1	1	1	1
2	2	1	2	2	1	16	38	15	0.77	1	0	0	0	2	1	2	1	6	1	C/C	A/A	C/C	1	1	1	1	1
2	3	1	2	2	2	9	39	17	0.42	1	2	1	0	2	0	0	1	6	1	C/C	A/A	C/C	1	1	1	1	1
2	3	2	2	2	2	14	37	20	0.69	1	2	1	0	3	0	0	0	6	1	C/T	C/A	C/T	2	2	2	2	2
1	3	1	2	1	1	17	34	19	0.92	1	1	2	1	0	0	1	1	6	1	C/C	C/C	T/T	1	3	3	1	2
2	2	1	2	2	2	17	34	16	0.92	1	1	1	0	1	1	1	1	6	1	C/C	A/A	C/C	1	1	1	1	1
2	1	2	1	2	2	18	37	20	0.89	1	1	1	0	3	0	0	1	6	1	C/T	C/A	C/T	2	2	2	2	2
2	1	1	1	2	1	20	42	22	0.87	1	0	1	0	1	1	2	1	6	1	C/T	C/A	C/T	2	2	2	2	2
1	1	1	1	2	1	14	33	15	0.78	1	1	0	0	1	1	2	1	6	1	T/T	C/C	T/T	3	3	3	2	2
1	1	1	1	1	1	15	32	16	0.86	1	1	2	0	1	1	0	1	6	1	T/T	A/A	C/C	3	1	1	2	1
2	2	1	2	2	2	6	27	6	0.41	1	2	1	0	0	0	2	1	6	1	C/C	A/A	C/C	1	1	1	1	1
1	3	1	3	2	2	14	31	15	0.83	1	1	2	1	0	1	1	0	6	1	C/T	C/A	C/T	2	2	2	2	2
2	1	1	1	2	2	12	39	17	0.56	1	0	0	0	2	1	2	1	6	1	C/T	C/A	C/T	2	2	2	2	2
1	1	1	2	1	2	20	40	17	0.92	1	1	1	0	2	1	1	0	6	1	C/T	C/A	C/T	2	2	2	2	2
1	3	2	2	1	1	16	33	16	0.89	1	2	2	1	2	0	0	0	7	1	C/C	A/A	C/C	1	1	1	1	1
1	4	1	2	2	2	18	33	18	1	1	1	1	0	2	2	0	1	7	1	C/C	A/A	C/C	1	1	1	1	1
1	3	2	2	1	1	6	11	6	1	1	1	1	0	2	3	0	0	7	1	C/C	A/A	C/C	1	1	1	1	1
1	2	2	2	1	1	17	34	23	0.92	1	3	0	0	1	0	0	3	7	1	C/T	C/C	C/T	2	3	2	2	2
1	3	1	2	1	2	18	36	20	0.92	1	1	1	0	2	1	0	2	7	1	C/C	A/A	C/C	1	1	1	1	1
1	1	1	2	1	1	15	36	18	0.76	1	2	1	0	2	1	0	1	7	1	C/C	A/A	C/C	1	1	1	1	1
1	3	1	2	2	1	12	29	14	0.76	1	2	1	1	0	1	0	2	7	1	C/C	A/A	C/C	1	1	1	1	1
2	1	1	2	2	2	20	38	22	0.96	1	0	2	0	2	1	0	2	7	1	C/C	A/A	C/T	1	1	2	1	1
2	1	1	1	2	2	17	39	23	0.8	1	2	2	0	0	1	0	2	7	1	C/C	A/A	C/C	1	1	1	1	1
1	1	1	2	1	1	6	19	7	0.58	1	1	1	0	2	1	0	2	7	1	C/T	C/A	C/T	2	2	2	2	2
2	3	1	2	2	2	15	29	19	0.95	1	2	1	0	2	1	0	1	7	1	C/T	C/A	C/T	2	2	2	2	2
2	3	1	3	2	2	7	30	10	0.43	1	1	1	2	2	0	0	1	7	1	C/C	A/A	C/C	1	1	1	1	1
1	2	1	2	2	2	15	33	15	0.83	1	1	2	0	1	0	2	1	7	1	T/T	C/C	T/T	3	3	3	2	2
1	4	1	2	1	1	20	39	20	0.94	1	1	1	0	1	1	2	1	7	1	C/C	A/A	C/T	1	1	2	1	1
2	3	1	2	2	2	19	39	22	0.89	1	1	1	0	1	1	2	1	7	1	C/T	C/A	C/T	2	2	2	2	2
2	2	2	2	2	2	18	35	22	0.94	1	1	1	0	3	0	2	0	7	1	C/C	A/A	C/C	1	1	1	1	1
1	4	1	2	1	2	16	32	16	0.92	1	1	1	0	1	2	1	1	7	1	C/C	A/A	C/C	1	1	1	1	1
2	2	1	2	2	2	19	40	19	0.87	1	0	2	0	0	1	3	1	7	1	C/C	C/C	C/T	1	3	2	1	2
2	2	1	2	2	2	16	31	10	0.95	1	3	1	0	2	2	0	0	8	1	C/C	A/A	C/C	1	1	1	1	1
1	2	1	3	1	2	20	37	19	0.99	1	1	1	0	3	1	0	2	8	1	C/T	A/A	C/T	2	1	2	2	1
1	3	2	2	1	1	11	36	15	0.56	1	3	0	0	2	1	1	1	8	1	C/C	A/A	C/T	1	1	2	1	1
1	4	1	2	1	1	17	36	16	0.87	1	0	1	2	2	1	0	2	8	1	C/C	A/A	C/C	1	1	1	1	1
1	2	1	2	1	1	18	34	21	0.97	1	2	1	1	0	1	0	3	8	1	C/C	A/A	C/C	1	1	1	1	1
1	2	1	2	2	2	16	33	18	0.89	1	2	1	1	3	1	0	0	8	1	C/T	C/A	C/T	2	2	2	2	2
1	3	1	2	2	2	16	30	18	0.98	1	2	1	0	2	1	1	1	8	1	C/C	A/A	C/T	1	1	2	1	1
1	4	1	2	2	2	18	35	18	0.94	1	1	1	0	3	1	0	2	8	1	C/C	A/A	C/C	1	1	1	1	1
2	3	2	2	2	2	21	40	20	0.96	1	0	1	0	2	2	2	1	8	1	C/C	A/A	C/C	1	1	1	1	1
1	1	1	1	2	1	19	40	20	0.87	1	1	1	0	2	1	2	1	8	1	C/C	A/A	C/C	1	1	1	1	1
1	2	2	2	2	1	17	32	18	0.97	1	0	1	0	2	2	2	1	8	1	C/T	C/A	C/T	2	2	2	2	2
2	2	1	2	2	2	10	30	18	0.61	1	0	2	1	2	1	1	1	8	1	C/T	C/A	C/T	2	2	2	2	2
2	1	1	2	2	2	19	39	23	0.89	1	0	0	2	2	1	2	1	8	1	C/T	C/A	C/T	2	2	2	2	2
1	2	1	2	1	1	12	34	18	0.65	1	1	1	1	0	2	2	1	8	1	C/C	C/C	C/C	1	3	1	1	2
1	3	1	1	1	1	15	31	17	0.89	1	1	2	0	0	2	2	1	8	1	C/C	A/A	C/T	1	1	2	1	1
1	1	2	2	1	2	14	31	16	0.83	1	2	2	0	2	1	0	2	9	1	C/T	C/A	C/T	2	2	2	2	2
1	2	1	2	2	1	18	35	19	0.94	1	2	1	0	2	2	0	2	9	1	C/T	C/A	C/T	2	2	2	2	2
2	2	1	2	2	2	19	36	22	0.97	1	2	2	0	2	1	1	1	9	1	T/T	C/C	T/T	3	3	3	2	2
2	3	1	2	1	2	11	29	15	0.7	1	0	1	1	2	1	3	1	9	1	C/T	C/A	C/T	2	2	2	2	2
2	2	2	2	2	1	19	35	15	1	1	1	2	0	2	3	0	2	10	1	C/C	A/A	C/C	1	1	1	1	1
2	1	2	1	2	2	12	37	16	0.59	1	2	1	1	1	3	0	2	10	1	C/C	A/A	C/C	1	1	1	1	1
1	2	2	2	1	1	14	32	16	0.8	1	1	1	1	3	2	0	2	10	1	C/T	C/A	C/T	2	2	2	2	2
1	3	1	2	2	1	16	34	18	0.86	1	0	2	0	3	2	2	1	10	1	C/C	A/A	C/C	1	1	1	1	1
1	2	2	2	1	1	14	34	22	0.75	1	3	2	1	2	1	1	1	11	1	C/T	C/A	C/T	2	2	2	2	2
2	4	1	2	2	1	16	41	15	0.72	1	0	8	0	1	1	0	1	11	1	C/C	C/C	C/C	1	3	1	1	2
1	2	1	3	1	1	12	22	12	1	1	2	2	0	3	2	2	1	12	1	C/C	A/A	C/C	1	1	1	1	1
2	2	1	2	2	2	12	37	22	0.59	1	0	8	0	2	1	0	1	12	1	C/C	A/A	C/C	1	1	1	1	1
1	3	1	2	1	1	13	28	12	0.85	1	2	2	2	0	3	2	1	12	1	C/T	C/A	C/T	2	2	2	2	2
2	3	2	3	1	1	17	40	10	0.78	1	2	3	2	1	3	2	1	14	1	C/C	A/A	C/C	1	1	1	1	1
1	2	1	3	1	1	13	38	18	0.63	1	2	3	2	2	3	2	1	15	1	C/T	C/A	C/T	2	2	2	2	2
1	4	1	2	2	2	19	37	24	0.94	1	1	8	0	1	2	2	1	15	1	C/C	A/A	C/C	1	1	1	1	1
2	3	1	2	2	2	21	35	23	1.1	2	2	0	0	2	1	0	0	5	1	C/C	A/A	C/C	1	1	1	1	1
2	3	1	2	2	2	21	34	18	1.13	2	3	1	0	0	0	0	1	5	1	C/C	A/A	C/C	1	1	1	1	1
1	4	1	3	2	2	30	51	30	1.08	2	2	1	0	2	0	0	0	5	1	C/C	A/A	C/C	1	1	1	1	1
1	1	2	1	1	2	22	27	23	1.49	2	1	0	0	1	1	0	2	5	1	C/T	C/A	C/T	2	2	2	2	2
1	2	1	2	1	1	18	27	6	1.22	2	3	1	0	1	0	0	0	5	1	C/T	C/A	C/T	2	2	2	2	2
2	3	1	2	2	2	19	33	18	1.06	2	1	1	0	2	1	0	0	5	1	C/T	C/A	C/T	2	2	2	2	2
1	4	2	2	2	2	30	43	6	1.28	2	2	1	0	1	0	0	1	5	1	C/T	C/A	C/T	2	2	2	2	2
1	2	1	3	1	1	25	33	12	1.39	2	0	1	0	1	1	1	1	5	1	C/C	A/A	C/C	1	1	1	1	1
1	4	2	2	1	1	19	34	18	1.02	2	0	1	0	2	1	0	1	5	1	C/C	A/A	C/C	1	1	1	1	1
2	3	1	2	2	2	20	35	20	1.05	2	1	1	0	1	0	0	2	5	1	C/T	C/A	C/T	2	2	2	2	2
1	2	1	2	1	1	20	25	18	1.47	2	0	0	0	2	1	1	1	5	1	C/T	C/A	T/T	2	2	3	2	2
1	4	1	2	1	1	23	32	20	1.32	2	1	1	0	1	1	0	1	5	1	T/T	C/C	T/T	3	3	3	2	2
2	3	1	2	2	2	23	32	20	1.32	2	1	1	0	0	1	1	1	5	1	C/T	C/A	C/T	2	2	2	2	2
2	2	1	2	2	1	24	38	19	1.16	2	0	1	0	3	0	0	1	5	1	C/C	A/A	T/T	1	1	3	1	1
2	4	1	2	2	2	21	30	18	1.28	2	0	1	0	0	1	0	3	5	1	T/T	A/A	C/C	3	1	1	2	1
2	3	1	2	1	2	10	16	12	1.15	2	0	1	1	0	1	1	1	5	1	T/T	A/A	C/C	3	1	1	2	1
1	2	2	2	1	1	23	41	18	1.03	2	1	1	0	0	1	0	2	5	1	T/T	A/A	C/C	3	1	1	2	1
2	1	2	1	2	2	22	31	19	1.3	2	0	1	0	0	2	0	2	5	1	T/T	A/A	C/T	3	1	2	2	1
2	3	1	2	2	2	20	32	20	1.15	2	1	0	0	0	2	1	1	5	1	T/T	A/A	C/C	3	1	1	2	1
1	1	1	2	1	1	30	43	12	1.28	2	0	1	0	1	2	0	1	5	1	T/T	A/A	C/T	3	1	2	2	1
2	1	2	3	2	1	21	28	20	1.37	2	1	1	0	1	1	0	1	5	1	T/T	A/A	C/C	3	1	1	2	1
2	3	1	2	2	2	23	35	16	1.2	2	1	1	0	1	1	0	1	5	1	T/T	A/A	C/T	3	1	2	2	1
2	1	1	1	2	2	21	35	19	1.1	2	0	1	0	1	1	0	2	5	1	T/T	A/A	C/C	3	1	1	2	1
1	1	1	2	2	2	14	21	12	1.22	2	0	1	0	0	2	0	2	5	1	T/T	A/A	C/C	2	1	1	2	1
1	1	1	1	2	2	18	30	13	1.1	2	0	1	0	3	0	0	1	5	1	T/T	A/A	C/C	2	1	1	2	1
1	3	1	2	1	1	20	34	18	1.08	2	1	1	1	0	1	0	1	5	1	T/T	A/A	C/C	2	1	1	2	1
1	1	1	1	1	1	18	32	15	1.03	2	0	0	0	0	2	0	3	5	1	T/T	A/A	C/C	3	1	1	2	1
2	3	1	2	2	2	25	36	22	1.27	2	1	0	0	1	2	0	1	5	1	C/C	A/A	C/C	1	1	1	1	1
2	3	1	2	2	2	13	22	12	1.08	2	0	0	0	1	2	0	2	5	1	T/T	A/A	C/C	3	1	1	2	1
1	3	2	1	1	1	14	21	14	1.22	2	0	2	0	0	1	1	1	5	1	C/C	A/A	C/T	1	1	2	1	1
2	3	1	2	2	2	20	31	18	1.18	2	0	1	0	0	1	2	1	5	1	C/C	A/A	C/C	1	1	1	1	1
1	3	1	2	2	1	21	33	19	1.17	2	0	0	0	1	1	2	1	5	1	C/C	A/A	C/C	1	1	1	1	1
2	3	2	2	2	2	25	30	26	1.53	2	0	0	0	0	1	3	1	5	1	C/C	A/A	C/C	1	1	1	1	1
2	2	2	1	1	2	19	33	16	1.06	2	0	2	0	0	1	1	1	5	1	C/C	A/A	C/C	1	1	1	1	1
2	2	1	2	2	2	21	35	18	1.1	2	0	1	0	0	1	2	1	5	1	C/C	A/A	C/C	1	1	1	1	1
1	2	2	2	1	1	20	33	10	1.11	2	0	2	0	0	1	1	1	5	1	C/C	A/A	C/C	1	1	1	1	1
2	2	1	2	2	2	24	37	20	1.19	2	0	0	0	1	0	2	2	5	1	C/C	A/A	C/C	1	1	1	1	1
2	2	1	2	2	2	19	32	18	1.09	2	1	1	0	0	1	1	1	5	1	C/C	A/A	C/C	1	1	1	1	1
2	2	2	2	2	2	22	40	23	1.01	2	0	1	1	0	1	1	1	5	1	C/C	A/A	C/T	1	1	2	1	1
2	2	1	2	2	2	24	29	17	1.52	2	0	1	0	0	1	2	1	5	1	C/C	A/A	C/C	1	1	1	1	1
1	4	2	2	2	1	30	26	24	2.12	2	0	1	0	0	1	2	1	5	1	C/C	A/A	C/C	1	1	1	1	1
1	3	1	2	1	1	18	32	13	1.03	2	0	0	0	0	2	2	1	5	1	C/C	A/A	C/C	1	1	1	1	1
2	3	2	3	2	1	18	32	21	1.03	2	0	0	0	2	1	1	1	5	1	C/C	A/A	C/T	1	1	2	1	1
1	2	1	2	2	1	25	36	18	1.27	2	1	0	0	0	1	1	2	5	1	C/C	A/A	C/C	1	1	1	1	1
1	3	1	2	1	1	24	18	6	2.44	2	1	2	0	0	1	1	0	5	1	C/C	C/A	C/T	1	2	2	1	2
2	2	1	2	2	2	23	31	19	1.36	2	0	0	0	2	1	1	1	5	1	C/C	A/A	C/C	1	1	1	1	1
2	3	1	2	2	2	8	12	7	1.22	2	0	1	0	3	1	0	0	5	1	T/T	A/A	C/C	3	1	1	2	1
1	1	1	1	1	1	20	32	19	1.15	2	0	1	0	3	1	0	0	5	1	T/T	A/A	C/C	3	1	1	2	1
2	2	2	2	2	2	21	33	19	1.17	2	0	0	1	0	1	2	1	5	1	T/T	A/A	C/C	3	1	1	2	1
2	2	2	2	2	2	22	38	20	1.06	2	0	1	0	0	1	2	1	5	1	C/C	A/A	C/C	1	1	1	1	1
1	1	1	1	2	1	16	27	12	1.09	2	0	1	1	0	1	1	1	5	1	C/C	A/A	C/C	1	1	1	1	1
2	3	1	2	2	1	19	29	17	1.2	2	0	0	0	1	1	2	1	5	1	T/T	A/A	C/C	3	1	1	2	1
2	2	1	2	2	2	21	35	19	1.1	2	0	2	0	0	1	1	1	5	1	C/T	C/A	C/T	2	2	2	2	2
2	3	1	2	2	1	23	38	24	1.11	2	0	1	1	0	1	1	1	5	1	C/T	C/A	C/T	2	2	2	2	2
2	2	1	2	2	2	28	32	22	1.6	2	0	1	0	1	2	0	1	5	1	C/T	C/A	C/T	2	2	2	2	2
2	3	2	3	2	2	22	34	17	1.19	2	1	1	0	0	1	1	1	5	1	C/T	A/A	C/T	2	1	2	2	1
2	3	1	3	2	2	15	24	12	1.15	2	1	1	0	0	1	1	1	5	1	C/T	C/A	C/T	2	2	2	2	2
1	2	1	2	1	1	24	39	24	1.13	2	0	1	0	0	1	2	1	5	1	C/T	C/A	C/T	2	2	2	2	2
2	2	1	2	2	2	26	33	23	1.44	2	0	1	1	0	1	1	1	5	1	C/T	A/A	C/T	2	1	2	2	1
2	1	1	2	2	1	19	32	20	1.09	2	0	1	0	0	1	2	1	5	1	C/T	C/A	C/T	2	2	2	2	2
1	3	1	2	1	1	22	35	19	1.15	2	0	1	0	3	1	0	0	5	1	C/T	C/A	C/T	2	2	2	2	2
2	4	1	2	2	1	18	29	18	1.14	2	0	2	0	0	1	1	1	5	1	C/T	C/A	C/T	2	2	2	2	2
2	2	1	2	2	2	27	32	26	1.55	2	0	1	0	0	0	2	2	5	1	C/T	C/A	C/T	2	2	2	2	2
2	1	2	1	1	1	21	28	14	1.37	2	0	1	0	3	1	0	0	5	1	C/T	C/A	C/T	2	2	2	2	2
1	4	2	2	1	1	20	35	22	1.05	2	0	1	0	1	1	1	1	5	1	C/T	C/A	C/T	2	2	2	2	2
2	2	2	2	2	2	21	25	14	1.54	2	0	1	1	2	1	0	0	5	1	T/T	A/A	C/T	3	1	2	2	1
2	2	1	1	2	1	21	36	20	1.07	2	0	0	0	0	1	3	1	5	1	C/C	A/A	T/T	1	1	3	1	1
2	1	1	1	2	2	21	33	17	1.17	2	0	1	0	0	1	2	1	5	1	C/T	C/A	T/T	2	2	3	2	2
2	3	1	2	2	1	21	38	21	1.01	2	0	0	0	0	1	3	1	5	1	C/T	C/A	T/T	2	2	3	2	2
2	3	2	2	2	2	18	32	18	1.03	2	0	0	0	0	1	1	3	5	1	T/T	C/A	T/T	3	2	3	2	2
1	3	1	2	2	1	23	40	20	1.05	2	0	1	1	0	1	1	1	5	1	T/T	C/A	T/T	3	2	3	2	2
1	2	2	1	2	2	21	34	13	1.13	2	0	1	0	1	0	0	3	5	1	T/T	C/C	C/C	2	3	1	2	2
1	1	1	3	1	1	19	33	19	1.06	2	0	1	0	0	1	1	2	5	1	T/T	C/C	C/C	2	3	1	2	2
2	2	1	2	2	2	20	24	16	1.53	2	0	1	1	0	1	0	2	5	1	T/T	C/C	C/C	2	3	1	2	2
1	3	1	2	1	1	22	25	6	1.61	2	0	1	0	3	0	0	1	5	1	T/T	C/C	C/T	3	3	2	2	2
2	1	2	1	2	2	28	33	17	1.56	2	0	3	0	0	1	0	1	5	1	T/T	C/C	C/C	3	3	1	2	2
1	2	1	2	1	1	20	33	18	1.11	2	0	1	0	2	0	0	2	5	1	T/T	C/C	C/C	3	3	1	2	2
2	3	1	2	2	2	16	25	20	1.17	2	1	0	0	0	1	0	3	5	1	T/T	C/C	C/C	3	3	1	2	2
2	3	1	2	1	1	22	35	19	1.15	2	2	1	0	0	1	0	1	5	1	T/T	C/C	C/C	3	3	1	2	2
1	2	1	2	1	1	17	27	15	1.15	2	1	1	0	0	1	1	1	5	1	C/C	C/C	C/C	1	3	1	1	2
2	3	1	2	2	1	20	33	14	1.11	2	1	1	0	1	1	1	0	5	1	C/C	C/C	C/C	1	3	1	1	2
1	3	1	2	2	1	15	26	12	1.06	2	1	1	0	0	1	1	1	5	1	C/T	C/C	C/T	2	3	2	2	2
2	4	1	2	1	1	10	17	10	1.08	2	1	1	0	0	2	0	1	5	1	T/T	C/C	T/T	3	3	3	2	2
2	2	1	2	2	2	21	35	25	1.1	2	0	1	0	0	1	2	1	5	1	T/T	C/C	T/T	3	3	3	2	2
2	1	1	1	2	2	19	30	18	1.16	2	0	0	1	0	0	3	1	5	1	T/T	C/C	T/T	3	3	3	2	2
2	2	1	2	2	2	17	30	15	1.04	2	1	1	0	1	1	0	1	5	1	T/T	C/C	T/T	3	3	3	2	2
2	3	2	2	2	2	23	37	25	1.14	2	3	2	0	1	0	0	0	6	1	C/T	C/A	C/T	2	2	2	2	2
1	2	1	2	1	1	23	35	16	1.2	2	2	1	0	2	1	0	0	6	1	C/C	A/A	C/C	1	1	1	1	1
1	3	1	2	1	1	18	29	18	1.14	2	2	1	0	1	1	0	1	6	1	C/C	A/A	C/C	1	1	1	1	1
1	2	1	1	1	1	18	30	18	1.1	2	0	1	0	2	1	1	1	6	1	C/T	C/A	C/T	2	2	2	2	2
1	4	1	2	2	1	20	34	18	1.08	2	2	1	0	0	1	1	1	6	1	C/T	C/A	C/T	2	2	2	2	2
1	3	1	2	1	1	20	36	19	1.02	2	1	0	0	3	1	0	1	6	1	C/C	A/A	C/C	1	1	1	1	1
2	1	1	1	2	1	22	35	21	1.15	2	1	1	0	2	0	1	1	6	1	C/C	A/A	C/T	1	1	2	1	1
1	2	1	1	2	1	18	32	18	1.03	2	1	1	0	1	1	1	1	6	1	T/T	A/A	C/C	3	1	1	2	1
1	1	1	2	1	1	16	25	18	1.17	2	0	0	1	1	0	3	1	6	1	T/T	A/A	C/C	3	1	1	2	1
2	2	1	2	2	1	24	32	19	1.37	2	0	1	0	1	1	2	1	6	1	T/T	A/A	C/C	3	1	1	2	1
1	1	1	2	2	1	22	33	16	1.22	2	0	2	1	0	1	1	1	6	1	C/T	C/A	C/T	2	2	2	2	2
2	1	1	2	2	2	22	39	19	1.03	2	2	1	0	0	0	0	4	7	1	C/C	A/A	C/T	1	1	2	1	1
1	3	1	2	1	1	30	29	26	1.9	2	1	1	0	2	1	0	2	7	1	C/C	A/A	C/C	1	1	1	1	1
1	3	1	2	1	1	17	29	6	1.07	2	2	1	0	2	0	0	2	7	1	C/C	A/A	C/C	1	1	1	1	1
1	4	1	2	1	1	19	27	19	1.29	2	2	1	2	0	0	0	2	7	1	C/C	A/A	C/T	1	1	2	1	1
2	3	1	2	2	1	20	29	17	1.26	2	2	0	1	3	0	1	0	7	1	C/C	A/A	C/C	1	1	1	1	1
2	2	1	2	2	2	25	31	22	1.48	2	2	0	0	2	1	1	1	7	1	C/C	A/A	C/T	1	1	2	1	1
2	2	1	2	2	1	19	34	14	1.02	2	2	1	0	2	0	1	1	7	1	C/T	A/A	C/T	2	1	2	2	1
1	2	1	2	1	1	19	34	18	1.02	2	2	1	0	2	1	0	1	7	1	C/T	C/A	C/T	2	2	2	2	2
2	3	2	2	2	2	23	36	21	1.17	2	1	0	0	0	2	3	1	7	1	C/C	A/A	C/C	1	1	1	1	1
1	4	1	1	1	2	21	35	22	1.1	2	2	1	0	1	1	1	1	7	1	C/T	C/A	C/T	2	2	2	2	2
1	3	2	2	2	2	27	27	22	1.83	2	0	1	1	0	2	0	3	7	1	T/T	A/A	C/C	2	1	1	2	1
1	2	1	1	1	1	22	37	19	1.09	2	1	1	0	1	1	2	1	7	1	T/T	A/A	C/C	3	1	1	2	1
1	2	2	2	1	1	24	37	21	1.19	2	2	2	0	0	1	1	1	7	1	T/T	A/A	C/C	3	1	1	2	1
2	2	1	2	2	1	23	37	21	1.14	2	0	0	0	2	1	3	1	7	1	C/T	C/A	C/T	2	2	2	2	2
1	1	1	2	1	1	30	43	12	1.28	2	1	1	0	1	2	0	2	7	1	T/T	A/A	C/C	3	1	1	2	1
1	1	1	2	1	1	20	34	20	1.08	2	1	1	0	1	1	2	1	7	1	T/T	A/A	C/C	3	1	1	2	1
2	2	1	2	2	2	16	26	14	1.13	2	0	2	1	0	1	2	1	7	1	T/T	A/A	C/C	3	1	1	2	1
1	3	1	2	1	1	28	46	20	1.12	2	1	1	2	0	1	2	0	7	1	C/C	A/A	C/C	1	1	1	1	1
1	1	1	1	1	1	22	31	19	1.3	2	0	1	0	2	1	2	1	7	1	C/T	C/A	C/T	2	2	2	2	2
1	2	1	2	2	1	15	25	7	1.1	2	3	0	0	3	1	0	1	8	1	C/C	A/A	C/C	1	1	1	1	1
1	3	1	2	2	2	20	32	18	1.15	2	2	1	1	2	1	0	1	8	1	C/C	A/A	C/C	1	1	1	1	1
2	1	1	1	2	2	16	29	15	1.01	2	1	0	0	3	1	1	2	8	1	C/T	C/A	C/T	2	2	2	2	2
2	2	1	2	2	1	21	37	25	1.04	2	1	0	0	2	2	2	1	8	1	C/C	A/A	C/C	1	1	1	1	1
1	4	1	3	1	1	19	30	16	1.16	2	0	1	1	3	1	1	1	8	1	C/T	C/A	C/T	2	2	2	2	2
2	3	1	2	2	2	22	37	22	1.09	2	0	2	0	2	1	2	1	8	1	C/C	A/A	C/C	1	1	1	1	1
2	4	1	2	2	2	18	30	18	1.1	2	1	1	1	2	1	1	1	8	1	C/C	A/A	C/C	1	1	1	1	1
1	1	2	1	2	2	26	40	18	1.19	2	1	1	3	2	0	0	1	8	1	C/C	A/A	C/C	1	1	1	1	1
1	3	1	2	1	1	15	24	10	1.15	2	0	1	3	2	1	0	1	8	1	C/C	A/A	C/C	1	1	1	1	1
1	3	1	2	1	1	23	32	19	1.32	2	2	2	0	0	2	1	1	8	1	C/T	C/A	C/T	2	2	2	2	2
2	1	1	1	2	2	21	37	18	1.04	2	2	1	0	0	1	2	2	8	1	C/T	C/A	C/T	2	2	2	2	2
1	1	1	3	1	1	23	37	19	1.14	2	0	0	2	2	1	2	1	8	1	C/T	C/A	C/T	2	2	2	2	2
2	3	2	2	2	2	21	34	23	1.13	2	1	2	1	0	1	2	1	8	1	C/C	A/A	C/C	1	1	1	1	1
2	1	1	1	2	2	15	26	16	1.06	2	1	3	0	0	1	2	1	8	1	T/T	A/A	C/C	3	1	1	2	1
2	2	1	2	2	2	19	34	19	1.02	2	2	2	0	2	1	1	0	8	1	T/T	A/A	C/T	3	1	2	2	1
1	2	1	2	2	2	18	28	15	1.18	2	1	2	1	0	1	2	1	8	1	C/T	C/A	C/T	2	2	2	2	2
1	1	1	3	2	2	24	35	21	1.26	2	0	2	2	0	1	2	1	8	1	T/T	A/A	C/C	3	1	1	2	1
2	3	1	2	2	1	14	24	15	1.07	2	0	3	0	3	0	1	1	8	1	T/T	A/A	C/C	3	1	1	2	1
1	3	1	2	1	1	26	46	26	1.04	2	2	1	0	0	2	2	1	8	1	T/T	A/A	C/T	3	1	2	2	1
1	2	2	2	1	1	24	35	21	1.26	2	2	0	0	3	0	1	3	9	1	C/C	A/A	C/C	1	1	1	1	1
1	2	2	2	1	1	30	21	9	2.62	2	2	1	0	2	2	0	2	9	1	C/C	A/A	C/C	1	1	1	1	1
1	1	1	1	1	2	30	43	12	1.28	2	3	1	0	0	3	0	2	9	1	C/T	C/A	C/T	2	2	2	2	2
2	2	1	2	2	2	18	32	12	1.03	2	2	0	0	2	2	0	3	9	1	C/T	C/A	C/T	2	2	2	2	2
2	3	1	2	2	2	21	37	15	1.04	2	3	1	0	2	1	1	1	9	1	C/T	C/A	C/T	2	2	2	2	2
1	2	1	2	1	1	23	39	24	1.08	2	2	1	2	0	1	2	1	9	1	C/C	A/A	C/C	1	1	1	1	1
1	3	1	2	2	1	23	32	18	1.32	2	2	0	0	2	2	2	1	9	1	C/T	C/A	C/T	2	2	2	2	2
2	3	1	2	1	2	8	11	6	1.33	2	2	1	0	1	2	2	1	9	1	C/C	A/A	C/C	1	1	1	1	1
2	2	1	2	2	1	30	34	26	1.62	2	0	2	0	0	2	3	2	9	1	T/T	A/A	C/T	3	1	2	2	1
1	3	1	2	1	1	24	31	18	1.42	2	2	1	0	2	3	0	2	10	1	C/C	A/A	C/C	1	1	1	1	1
1	1	2	2	1	1	21	35	20	1.1	2	1	2	0	3	3	0	1	10	1	C/T	C/A	C/T	2	2	2	2	2
1	1	1	1	1	1	20	32	20	1.15	2	2	2	0	2	1	2	1	10	1	C/C	A/A	C/C	1	1	1	1	1
1	1	1	1	1	2	18	32	12	1.03	2	3	2	0	0	1	3	1	10	1	T/T	C/A	C/C	3	2	1	2	2
1	2	1	2	1	1	18	32	18	1.03	2	1	2	0	3	2	1	1	10	1	T/T	A/A	C/C	3	1	1	2	1
1	1	1	1	2	2	7	11	6	1.17	2	2	1	0	3	2	0	3	11	1	C/C	A/A	C/C	1	1	1	1	1
2	1	1	2	2	1	19	33	21	1.06	2	2	3	0	1	3	2	1	12	1	C/T	C/A	C/T	2	2	2	2	2
2	3	1	2	2	2	23	33	21	1.28	2	2	3	1	2	3	3	2	16	1	C/T	C/A	C/T	2	2	2	2	2
